1 **Genome assembly and analysis of the flavonoid and phenylpropanoid**  
2 **biosynthetic pathways in Fingerroot ginger (*Boesenbergia rotunda*)**

3  
4

5 <sup>1</sup> Sima Taheri [sima.taheri100@gmail.com](mailto:sima.taheri100@gmail.com)

6 <sup>1</sup> Teo Chee How [cheehow.teo@um.edu.my](mailto:cheehow.teo@um.edu.my)

7 <sup>2,9</sup> John S. Heslop-Harrison [phh4@leicester.ac.uk](mailto:phh4@leicester.ac.uk)

8 <sup>2,9</sup> Trude Schwarzacher [ts32@leicester.ac.uk](mailto:ts32@leicester.ac.uk)

9 <sup>3</sup> Tan Yew Seong [tyewseong@yahoo.com](mailto:tyewseong@yahoo.com)

10 <sup>4</sup> Wee Wei Yee [wee.weiyee@monash.edu](mailto:wee.weiyee@monash.edu)

11 <sup>5</sup> Norzulaani Khalid [norzulaani@iumw.edu.my](mailto:norzulaani@iumw.edu.my)

12 <sup>2</sup> Manosh Kumar Biswas [mkb35@leicester.ac.uk](mailto:mkb35@leicester.ac.uk)

13 <sup>6</sup> Naresh V R Mutha [nareshmvr@gmail.com](mailto:nareshmvr@gmail.com)

14 <sup>1,7</sup> Yusmin Mohd-Yusuf [yusmin\\_y@um.edu.my](mailto:yusmin_y@um.edu.my)

15 <sup>8</sup> Han Ming Gan [hxg2760@gmail.com](mailto:hxg2760@gmail.com)

16 <sup>1,3</sup> \*Jennifer Ann Harikrishna [jennihari@um.edu.my](mailto:jennihari@um.edu.my)

17 (\*corresponding author)

18

19 1. Centre for Research in Biotechnology for Agriculture, University of Malaya, 50603 Kuala

20 Lumpur, Malaysia

21 2. Department of Genetics and Genome Biology, University of Leicester, Leicester LE1 7RH,

22 UK

23 3. Institute of Biological Sciences, Faculty of Science, University of Malaya, 50603 Kuala

24 Lumpur, Malaysia

25 4. School of Science, Monash University Malaysia, 47500 Subang Jaya, Malaysia

26 5. International University of Malaya-Wales, 50603 Kuala Lumpur, Malaysia

27 6. Division of Infectious Diseases, Vanderbilt University Medical Center, Nashville-TN 37203,

28 USA.

29 7. Biology division, Centre for Foundation Studies in Science, University of Malaya, 50603

30 Kuala Lumpur, Malaysia

31 8. Department of Biological Sciences, Sunway University, Bandar Sunway, 47500 Petaling

32 Jaya, Selangor, Malaysia

33 9. Key Laboratory of Plant Resources Conservation and Sustainable Utilization / Guangdong

34 Provincial Key Laboratory of Applied Botany, South China Botanical Garden, Chinese

35 Academy of Sciences, Guangzhou 510650, China

36

37

## 38 **Abstract**

39 *Boesenbergia rotunda* (Zingiberaceae), is a high-value culinary and ethno-medicinal plant of  
40 Southeast Asia. The rhizomes of this herb have high flavanone and chalcone content. Here we  
41 report genome analysis of *B. rotunda* together with a complete genome sequence as a hybrid  
42 assembly. *B. rotunda* has an estimated genome size of 2.4 Gb which was assembled as 27,491  
43 contigs with N50 size of 12.386 Mb. The highly heterozygous genome encodes 71,072 protein-  
44 coding genes and has 72% repeat content, with class I TEs occupying ~67% of the assembled  
45 genome. Fluorescence *In Situ* Hybridization of the 18 chromosome pairs at metaphase showed  
46 six sites of 45S rDNA and two sites of 5S rDNA. SSR analysis identified 238,441 gSSRs and  
47 4,604 EST-SSRs with 49 SSR markers common among related species. Genome-wide  
48 methylation percentages ranged from 73% CpG, 36% CHG and 34% CHH in leaf to 53% CpG,  
49 18% CHG and 25% CHH in embryogenic callus. Panduratin A biosynthetic unigenes were  
50 most highly expressed in watery callus. *B. rotunda* has a relatively large genome with high  
51 heterozygosity and TE content. This assembly and data (PRJNA71294) comprise a source for  
52 further research on the functional genomics of *B. rotunda*, the evolution of the ginger plant  
53 family and the potential genetic selection or improvement of gingers.

54

## 55 **Keywords:**

56 *Boesenbergia rotunda*; DNA methylation; genome assembly; ginger; panduratin A; SSR; TE  
57

## 58 **Introduction**

59

60 *Boesenbergia rotunda* (L.) Mansf. (*syn. B. pandurata* (Roxb.) Schltr.) (ITIS Taxonomic Serial  
61 No.: 506504), commonly known as Fingerroot ginger and as a type of galanga or galangal, is  
62 a member of the family Zingiberaceae in the order Zingiberales. With 50 genera and 1,600  
63 species, the Zingiberaceae is the largest family in the order, along with other families of ginger  
64 (Zingiberaceae, Costaceae, Marantaceae, Cannaceae) and banana (Musaceae, Strelitziaceae,  
65 Lowiaceae, Heliconiaceae) that include many economically important plant species<sup>1,2</sup>. The  
66 Zingiberaceae family consists of herbaceous perennial plants that are distributed over tropical  
67 and subtropical regions with the highest diversity in Southeast Asia (especially Indonesia,  
68 Malaysia and Thailand), India and Southern China<sup>3,4,5,6</sup>. The leaves, flowers and in particular  
69 the rhizomes of many of the Zingiberaceae family members are used as flavouring agents and  
70 for herbal medicine<sup>4,7</sup>.

71

72 Boesenbergia is a genus of about 80 species, distributed from India to Southeast Asia <sup>3,8,9,10</sup>. *B.*  
73 *rotunda* is a perennial herb propagated via rhizomes and widely cultivated commercially for  
74 its rhizomes and shoots to flavour food and for ethno-medicinal use <sup>11,12</sup>. Research on the  
75 secondary metabolites of *B. rotunda* has focused on the medicinal properties of rhizome  
76 extracts, in particular flavanones and chalcones including panduratin A, pinocembrin,  
77 pinostrobin, alpinetin, boesenbergin, cardamonin, naringenin, quercetin, and kaempferol  
78 <sup>8,13,14,15,16,17,18,19</sup>. Of these, the flavonoid compounds panduratin A/DI, 4-hydroxypanduratin,  
79 and cardamonin show the clearest biological and pharmacological effects such as anti-  
80 inflammatory <sup>20,21</sup>, anti-tumor activity against human breast and lung cancers <sup>22,23,24,25,26</sup>, and  
81 antimicrobial activity against HIV protease <sup>27</sup>, Dengue-2 (DEN-2) virus NS3 protease <sup>28,29</sup>,  
82 SARS-CoV-2 in human airway epithelial cells <sup>30</sup>, the oral bacteria *Streptococcus mutans* <sup>31,32</sup>,  
83 *Helicobacter pylori* <sup>33</sup>, and against the spoilage bacteria *Lactobacillus (Lactiplantibacillus)*  
84 *plantarum* <sup>34</sup>. A recent patent claimed that panduratin derivatives from *B. rotunda* have  
85 potential for preventing, ameliorating, or treating bone loss disease <sup>35</sup>, while 4-  
86 hydroxypanduratin was reported to have the most potent vasorelaxant activity among the major  
87 flavonoids of *B. rotunda* extracts <sup>36</sup>.

88 The ethnomedicinal and potential pharmaceutical importance of *B. rotunda* have led to interest  
89 in exploring cell and tissue culture for secondary metabolite production. In commercial farms,  
90 the plant is propagated clonally from rhizomes, and several protocols for multiplication via *in*  
91 *vitro* culture have been reported including plantlet regeneration via somatic embryogenesis  
92 from callus cultures <sup>37,38</sup>, from shoot bud explants <sup>39</sup> and from embryogenic cell suspension  
93 cultures <sup>38</sup>. Cell suspensions of *B. rotunda* <sup>17,40</sup> and various types of callus <sup>41,42</sup> have been  
94 explored as potential sources for alpinetin, cardamonin, pinocembrin, pinostrobin and  
95 panduratin A. Reproducible methods for *in vitro* cell culture of *B. rotunda*, led to protocols for  
96 genetic transformation <sup>38</sup>, that could facilitate metabolic engineering of cell materials for  
97 specific desirable metabolite production. However, current knowledge of the underlying  
98 biosynthetic pathways is sparse. Other than biochemical profiling <sup>16,42</sup>, the application of  
99 current technologies for determining deep sets of the genetic sequences expressed in various  
100 tissue and cell types can deliver useful information.

101 Genomic level studies improve understanding of the biology and biochemistry of the plant and  
102 can be applied in breeding for improved agronomy and plant products. Whole genome  
103 sequencing identifies genes and regulatory sequences for complex biological processes such as  
104 secondary metabolite biosynthesis <sup>43,44,45</sup>, while transcriptional profiling provides information  
105 for functional studies. Structural genomic studies have been undertaken in other Zingiberales

106 including turmeric (*Curcuma longa*; genome size of 1.24 Gb)<sup>46</sup> and for several Musaceae  
107 species and cultivars, which have genome sizes ranging from 462 Mb to 598 Mb (Banana  
108 Genome Hub <https://banana-genome-hub.southgreen.fr/>)<sup>47</sup>; while the Pan-genome of *Musa*  
109 *Ensete* has a genome size of 951.6 Mb<sup>48</sup>. Larger plant genomes have now been sequenced  
110 including those of important monocot species such as wheat ~ 17 Gb (International Wheat  
111 Genome Sequencing Consortium), *Aegilops tauschii* ~ 4.3 Gb<sup>49</sup>, oil palm ~ 1.8 Gb<sup>50</sup> and maize  
112 ~ 2.6 Gb<sup>51</sup>, in addition to species known for their unique metabolites such as tea (*Camellia*  
113 *sinensis*) ~ 2.98 Gb<sup>52,53</sup> and ginseng (*Panax ginseng*) ~ 3.2 Gb<sup>54</sup>. However, even with the  
114 recent advances in long sequence technology, large plant genomes can be challenging to  
115 assemble due to high repeat content and high levels of heterozygosity<sup>55,56</sup>.

116 The availability of an assembled genome sequence expands the functional biological questions  
117 that can be asked, since regulatory and variable elements, many of which may be involved in  
118 epigenetic regulation, cannot be seen purely using expression data. So while transcriptome<sup>40</sup>  
119 and proteome<sup>57</sup> data for *B. rotunda* are available, the lack of a previously published genome  
120 assembly is a limitation for functional studies. Genome assemblies also facilitate the  
121 exploration of genomic repeats which can not only be a source for genetic markers but are also  
122 drivers of genome size, gene content and order, centromere function and reflect genome  
123 evolution<sup>58,59</sup>. Last but not least, the epigenetic dynamism in genomes mainly involves “non-  
124 coding DNA” thus a genome assembly provides the framework for epigenetic studies.  
125 Therefore, in the current investigation we performed the first complete genome sequence for  
126 *B. rotunda* made with a hybrid assembly strategy using Pacific Biosciences (PacBio) and  
127 Illumina HiSeq platforms. We explored the sites of 45S rDNA and 5S rDNA on metaphase  
128 chromosomes observed by Fluorescence *In Situ* Hybridization (FISH). In addition, we carried  
129 out a deep transcriptome (RNA-seq data) assembly from five *B. rotunda* samples, including  
130 various types of callus cultures, and leaves. Gene expression profiles and bisulfite seq DNA  
131 methylation data from these tissues and samples were used for co-expression analysis to  
132 identify any association of gene expression and local DNA methylation of unigenes related to  
133 methylation, somatic embryogenesis, and pathways for flavonoid and phenylpropanoid  
134 biosynthesis. We also report novel expressed sequence tags-SSR (EST-SSR) and genomic SSR  
135 markers for *B. rotunda* and the estimated cross-transferability of the designed primers between  
136 *B. rotunda* and closely related species to provide deeper genetic resources to support further  
137 study of the biology and biodiversity in this genus. Genomic information and complete  
138 sequence data for this less investigated herb should provide a solid foundation as a vital step in

139 genetic analysis to facilitate *B. rotunda* improvement and to reach a deeper understanding of  
140 the metabolic pathways of its natural products.

141

## 142 **Results**

### 143 **Chromosomes and location rDNA sites**

144 *Boesenbergia rotunda* ( $2n=36$ ; 18 pairs of submetacentric chromosomes) has 3 pairs of 45S  
145 rDNA sites near the ends of three pairs of chromosomes (Fig. 1a). One pair of 5S rDNA sites  
146 (Fig. 1d) are on a chromosome pair not bearing 45S rDNA.

### 147 **Genome assembly**

148 Genomic DNA from leaves of a single, clonal *B. rotunda* plant was sequenced using multiple  
149 approaches (Table S1), with 114 Gb PacBio long reads, 260 Gb of Illumina HiSeq 2500 250bp  
150 paired-end reads, and 90 Gb of mate-paired reads with 2, 5, 10, 20 and 40 kb insert sizes. Based  
151 on k-mer analysis ( $k=17$ , GenomeScope), the estimated haploid genome size of *B. rotunda* was  
152 2.4Gb (Fig. S1), consistent with flow cytometry (Fig. S2). The heterozygosity was estimated  
153 as 3.01%. A hybrid genome assembly pipeline combining Illumina data and PacBio data was  
154 adopted (Fig. S3). The final assembled genome size was 2.347Gb characterized by 27,491  
155 contigs and 10,627 scaffolds, with contig N50 of 123.86 kb and scaffold N50 of 394.68 kb  
156 (Table 1). Based on benchmarking universal single-copy orthologs (BUSCO) analysis<sup>60</sup>  
157 mapping the *B. rotunda* genome against a set of 1,440 core eukaryotic genes, 1,232 (85.6%)  
158 were present (Table S2). Assembly quality assessment showed over 95% of Illumina PE250  
159 reads to map to the contig assembly (Table 2).

160

### 161 **Annotation of the *B. rotunda* genome**

162 Five sets of RNA-seq datasets were generated from three cell culture types, *in vitro* and *ex vitro*  
163 leaves of *B. rotunda*, given the importance for secondary metabolites production. Individual  
164 transcriptomes were assembled from these RNA-seq reads using different *de novo*  
165 transcriptome assemblers (Table 3, Fig. S4). The assembled transcriptome size ranged from 31  
166 to 71 million base pairs with 72,085 to 158,465 contigs for the Oases, SOAPdenovo-Trans,  
167 TransAbyss, and Trinity (Table 3, Fig. S4). Oases had the highest N50 size and average contig  
168 length. The BUSCO quantitative measure of the completeness transcriptomes in terms of  
169 expected gene content scores, also showed Oases (36.7%) and TransAbyss (36.6%) to give  
170 assemblies with higher numbers of complete and single copy contigs compared to

171 SOAPdenovo-Trans and Trinity (31.7%) (Fig. S5). The non-redundant transcript sequences  
172 formed from Oases followed by TGICL were used to annotate the *B. rotunda* genome and for  
173 downstream expression analysis.

174 Based on a combination of *de novo* and homology-based gene prediction methods, 72.51% of  
175 the genome (1.70 Gb) was annotated as repeats including 6.94% tandem repeats. Among Class  
176 I TEs (Retroelements), long terminal repeats (LTRs) constituted the greatest proportion of the  
177 genome (67.16%) while DNA TE made up 3.29 % of the genome (Fig. S6, Table 4). From  
178 10,627 assembled contigs and 95,847 assembled transcriptome sequences searched for SSRs,  
179 (Table 5, Fig. 2), the density of the microsatellites was 102 SSR loci per Mbp in genomic and  
180 69 SSR loci per Mbp in transcriptome sequences. Among the identified repeat motif types,  
181 trinucleotides were the most abundant in both genomic (35.62%) and transcriptome (51.67%)  
182 sequences, followed by mono- and dinucleotide repeats (Table 5, Fig. 2a). Class II type SSR-  
183 loci (<30bp) were two-fold higher than class I type in genomic sequences, whereas class II type  
184 SSR-loci were four-fold higher than class I types SSR loci in the transcriptome sequences (Fig.  
185 2b). The number of AT rich microsatellites was significantly higher than that of GC rich and  
186 microsatellites with balanced GC content.

187 Mapping of *B. rotunda* SSR to close relatives using newly designed primer sequences showed  
188 that from the 93.81% of the genomic SSR and 73.12% of the transcriptome sequences suitable  
189 for SSR primer design, only a low number of primers mapped to the selected relatives, *Musa*  
190 *acuminata*, *Musa balbisiana*, *Musa itinerans* and *Ensete ventricosum* (Table 5). Overall, 224  
191 G-SSR and 65 EST-SSR primers showed transferability into any of the four related species  
192 (with slightly more in *Ensete*), while only 42 genomic SSRs and 7 transcript SSRs were  
193 common to all five genomes (Fig. 2c, d). A subset of 14 *B. rotunda* SSR primer pairs (Table  
194 S3) were tested for their marker potentiality and showed that all amplified bands of the  
195 expected sizes for each species (Fig. S7).

196 The annotation of predicted protein-coding genes was a combination of homology-based and  
197 *de novo* prediction in addition to comparison with *B. rotunda* transcriptome data (Table S4).  
198 After consolidation, 73,102 protein-coding genes were predicted in the *B. rotunda* genome with  
199 an average transcript length of 4,312 bp (excluding UTR), CDS length of 1,360bp, average  
200 exon and intron lengths of 303bp and 812bp, and 4.49 exons per gene (Table S4). For the  
201 homology-based protein-coding gene predictions, protein sequences from four species (*M.*  
202 *acuminata*, *Phoenix dactylifera*, *Oryza sativa* and *Arabidopsis thaliana*) were mapped onto the  
203 *B. rotunda* genome. From these alignments, *B. rotunda* had the highest number of matches  
204 with *P. dactylifera* followed by *O. sativa*, *A. thaliana* and *M. acuminata* (Fig. S8). Functional

205 annotation of the 73,102 predicted proteins from *B. rotunda* against seven databases enabled  
206 functional predictions for 97.8% of the predicted genes (Table 6). Non-coding RNA analysis  
207 of the assembly identified 213 microRNA (miRNA), 2,727 transfer RNA (tRNA), 486  
208 ribosomal RNA (rRNA), and 2,136 small nuclear RNA (snRNA) genes (Table 7).

209 A final genome annotation was performed by using MAKER together with *de novo* assembled  
210 non-redundant transcripts, predicted proteins, non-coding RNAs and repeats.

211

## 212 **Functional classification by Gene Ontology**

213 From a total of 95,847 unigenes derived from the *B. rotunda* transcriptome, 41,550 unigenes  
214 (43.35%) were found significantly scoring BLASTX hits against the NR protein database. Of  
215 these 6,850 (7.15% of the total unigenes) returned significant sequence alignments but could  
216 not be linked to any Gene Ontology entries; 6,038 (6.3%) of the GO mapped dataset did not  
217 obtain an annotation assignment and we could assign functional labels to 28,662 (29.9%) of  
218 the input sequences (Fig. S9). Species distribution among the BLASTX matches showed *M.*  
219 *acuminata* subsp. *malaccensis* to have a very high similarity score with 87,000 top BLASTX  
220 hits from *B. rotunda*. Other species matches included Ethiopian banana, *Ensete ventricosum*  
221 (Musaceae) with 70,000 hits, African oil palm, *Elaeis guineensis* (Arecaceae) with 62,500  
222 BLASTX hits and date palm, *Phoenix dactylifera* (Arecaceae) with 62,000 BLASTX hits (Fig.  
223 S10). The annotated sequences assigned to GO classes based on Nr annotation in three clusters  
224 of biological process, molecular function and cellular component were categorized into 60  
225 functional groups, with biological processes representing the largest number of sequences (Fig.  
226 3a).

227 Blast2GO enzyme code (EC) annotation showed the distribution of *B. rotunda* predicted  
228 proteins among six main enzyme classes of oxidoreductases (1,400), transferases (3,500),  
229 hydrolases (2,250), lyases (450), isomerases (250), and ligases (270) (Fig. S11). The KOG  
230 function classification produced Nr hits for 18,767 unigenes which were annotated and  
231 classified functionally into 25 KOG functional categories including biochemistry metabolism,  
232 cellular structure, signal transduction, and molecular processing (Fig. 3b). The cluster for  
233 general function prediction represented the largest group with 2,396 genes followed by signal  
234 transduction mechanism (2,178) and posttranslational modification, protein turnover, and  
235 chaperons' with 2,031 genes. All unigenes were analysed by comparison with the KEGG  
236 pathway database for further analysis of the *B. rotunda* transcriptome. Out of 28,662 annotated  
237 sequences, 1,494 (5.21%) unigenes were assigned to 145 predicted metabolic pathways.

### 238 **Phylogenetic orthology inference of *B. rotunda* genes**

239 A total of 62,520 orthogroups were found with Orthofinder<sup>61</sup> (Table S5) with matches of genes  
240 from *B. rotunda* to 979,315 genes from 13 other species (*Glycine max*, *Cucumis melo*,  
241 *Gossypium raimondii*, *Brassica napus*, *Arabidopsis thaliana*, *Solanum tuberosum*, *Solanum*  
242 *lycopersicum*, *Musa acuminata*, *Zea mays*, *Oryza sativa* subsp. *japonica*, *Hordeum vulgare*,  
243 *Phoenix dactylifera* and *Brachypodium distachyon*). Of these, 7,276 orthogroups were shared  
244 among all species and there were no single copy orthogroups (Table S5). The species tree  
245 inferred by STAG<sup>62</sup> and rooted by STRIDE<sup>63</sup> indicated that *B. rotunda* has the closest  
246 relationship with *M. acuminata* (order Zingiberales) and *P. dactylifera* (order Arecales)  
247 followed by members of the Poaceae family (*Z. mays*, *O. sativa* subsp. *japonica*, *H. vulgare*,  
248 and *B. distachyon*) and was distant from plant species from the Solanaceae, Brassicaceae,  
249 Malvaceae, Cucurbitaceae, and Fabaceae (Fig. 4a Table S5). UpSet plotting showed 7,276  
250 orthogroups shared between *B. rotunda* and 13 selected reference genomes (Fig. 4b). 1,849  
251 protein orthologs are specific for *B. rotunda* and 274 orthogroups shared among 13 selected  
252 reference genomes except for *B. rotunda*.

253

### 254 **Gene family expansion and contraction**

255 Using the data generated from OrthoFinder<sup>61</sup>, we explored gene family expansion and  
256 contractions in *B. rotunda* (Fig. 4a). In total, there are 17,106 gene families shared by the most  
257 recent common ancestor (MRCA). There were large numbers of gene families expanding (53–  
258 10,855) or contracting (16–11,754) between 14 plant genomes (Fig. 4a). Our results show the  
259 substantial expansion of gene families in the Poaceae (5,557) followed by Brassicaceae (5,104)  
260 and the Pooideae subfamily (4,205). A large gene family contraction was observed in  
261 Solanaceae (8,975). Interestingly, the majority of the genomes with reported ancient whole  
262 genome duplication or massive segmental duplications or major chromosomal duplications  
263 show higher number of gene family duplications than gene family losses (indicated by asterisks  
264 in Fig. 4a).

265

### 266 **Transcriptome changes of *B. rotunda* unigenes related to flavonoid and phenylpropanoid 267 biosynthesis pathways**

268 Transcriptome analysis showed in total 167 unigenes from *B. rotunda* were mapped to five  
269 different classes of enzymes including oxidoreductase, transferase, ligase, lyase, and hydrolase  
270 in flavonoid and phenylpropanoid pathways. Of these, only 23 enzymes showed differential



271 expression in the different samples i.e., *in vitro* leaf (IVL), embryogenic callus (EC), and non-  
272 embryogenic calli (dry callus (DC) and watery callus (WC)) using *ex vitro* leaf (EVL) samples  
273 as the comparator (Fig. 5, Table S6). The first enzyme in the phenylpropanoid pathway is  
274 phenylalanine ammonia-lyase (PAL) which converts phenylalanine to cinnamic acid. PAL was  
275 expressed at the lowest levels among all samples in IVL with the highest expression level in  
276 WC (indicated by dark red squares in Fig. 5). Then coenzyme A (CoA) will be attached to  
277 cinnamic acid or *p*-coumaric acid by 4-coumarate–CoA ligase (4CL) and form cinnamoyl-CoA  
278 or *p*-coumaroyl-CoA. This enzyme showed relatively higher expression in all samples except  
279 EC. In the phenylpropanoid pathway, cinnamic acid is also converted to coumarinate by Beta-  
280 glucosidase (BGLU) to produce coumarin. BGLU was expressed in all samples, with the  
281 highest expression level in non-embryogenic calli (NEC). Then CHS, chalcone synthase (CHS)  
282 converts cinnamoyl-CoA to pinocembrine chalcone and *p*-coumaroyl CoA to naringenin  
283 chalcone. CHS was expressed in all samples except IVL with the highest expression level in  
284 WC. In the next step, the two flavanones of pinocembrin and naringenin are synthesised by  
285 chalcone isomerase (CHI). CHI was expressed in all samples except IVL with the highest  
286 expression level in EC. Pinocembrin is converted to pinostrobin by flavanone-3-hydroxylase  
287 (F3H) which serves as precursor of panduratin A synthesis. Expression analysis of unigenes  
288 related to F3H enzyme and dihydroflavonol 4-reductase (DFR) which are involved in the  
289 synthesis of anthocyanidins such as pelargonidin, cyanidin, and delphinidin, showed DFR to  
290 be more highly expressed in DC and WC compared to other samples, while F3H was only  
291 relatively up-regulated in WC. Other enzymes in the phenylpropanoid pathway include  
292 hydroxycinnamoyl-CoA shikimate (HCT), cinnamoyl-CoA reductase (CCR), cinnamyl  
293 alcohol dehydrogenase (CAD; EC1.1.1.195), caffeoyl-CoA O-methyltransferase  
294 (CCOAMT), and lactoperoxidase enzyme (LPO) involved in monolignols synthesis such as  
295 *p*-hydroxyphenyl (H), guaiacyl (G) and syringyl (S). Among them, HCT, CCOAMT, and  
296 CAD showed higher expression in all samples, except IVL for CAD, while CCR showed higher  
297 expression in WC. The gene expression differences between the tissue samples for cinnamic  
298 acid 4-hydroxylase (C4H), *p*-coumarate 3-hydroxylase (C3H), ferulate 5-hydroxylase (F5H),  
299 caffeic acid O-methyltransferase (COMT), and cinnamyl alcohol dehydrogenase (CAD) were  
300 below the threshold of FPKM without any differential expression in studied samples.

301

### 302 **DNA methylation analysis using bisulfite sequencing**

303 Genome wide methylation percentages determined from bisulfite sequence data from leaf and  
304 four tissue cultured samples, were higher in all methylated cytosine contexts for samples from

305 EVL (CpG 73.2%, CHG 36.2%, CHH 33.7%) and IVL (CpG 71.3%, CHG 35.4%, CHH 33.5%).  
306 The lowest levels were for EC (CpG 53.4%, CHG 18.5%, CHH 25.3%), followed by WC (CpG  
307 63.8%, CHG 21.9%, CHH 28.1%) and DC (CpG 68.4%, CHG 25.9%, CHH 28.6%). We also  
308 evaluated DNA methylation levels of three groups of genes (30 genes in total) including DNA  
309 methyltransferase-related genes across the genome of *B. rotunda* (Fig. 6a-d). In general, CHH  
310 methylation levels were higher than methylation levels in CpG and CHG context and out of 30  
311 genes, 22 genes (73.3%) showed low methylation levels (<0.1) in CHG and CHH cytosine  
312 contexts whereas only 30% of the genes showed low methylation levels in the CpG context.  
313 Cytosine methylation of methylation-related genes in all cytosine contexts (CpG, CHG & CHH)  
314 was the highest for *DRM2* and followed by *MET1*, and *CMT3* (Fig. 6a-d). Among somatic  
315 embryogenesis-related genes, *WOX* gene was heavily methylated in CpG and CHG contexts  
316 compared to other somatic embryogenesis-related genes (*LEC2*, *BBM*, *SERK*) (Fig. 6a-d). For  
317 pathway-related genes, *LPOs* methylated more in all studied samples compared to other genes.  
318

### 319 **Correlation between gene expression levels and DNA methylation levels of genes related** 320 **to methylation, somatic embryogenesis and secondary metabolite pathway**

321 From gene expression analysis, we observed that the expression level of DNA  
322 methyltransferase genes, *MET 1*, *CMT 3*, and *DRM2* was higher in callus than leaf samples  
323 and was highest in embryogenic callus (EC) for all three genes and lowest in *in vitro* leaf (IVL)  
324 (Fig. 7a). *DRM2* showed the lowest level of expression and the highest level of DNA  
325 methylation. DNA methylation levels of these genes at CpG, CHG, CHH cytosine contexts  
326 were the highest in DC and WC with similar and lower methylation levels in the embryogenic  
327 callus and leaf samples. Overall, expression of methylation-related genes was higher in samples  
328 EC, DC, and WC but other than for *CMT3*, which showed an inverse relationship between  
329 expression level and methylation levels, there was no clear correlation between level of DNA  
330 methylation and level of gene expression (Fig. 7b). Similarly, while there were different  
331 expression patterns for the four somatic embryogenesis-related genes *SERK*, *BBM*, *LEC2*, and  
332 *WOX* between different leaf and callus samples (Fig. 7c), the DNA methylation level of each  
333 gene across the different leaf and callus samples was largely unchanged (Fig. 7d). A  
334 comparison of 23 of *B. rotunda* genes involved in flavonoid and phenylpropanoid pathways  
335 showed them to be expressed differentially in *B. rotunda* leaf and callus samples. Among them,  
336 *BGLU*, *CAD*, *CHS*, *LPO8*, *LPO9* and *PAL* were expressed more highly in callus than in leaf  
337 samples (Fig. 7e). The highest level of DNA methylation was observed for *HCT*, *CCR*, and

338 *LPO2* genes in all studied samples and again, there was no general correlation between gene  
339 expression levels and methylation levels for these samples (Fig. 7f).

## 340 **Discussion**

341 We present a genome assembly of *Boesenbergia rotunda* (2n=36) with an estimated genome  
342 size of 2.4Gb. The genome of the plant we sequenced, when in cultivation a largely vegetatively  
343 propagated species, shows an unusually high heterozygosity of 3.01%, suggesting that the  
344 cultivar may be of hybrid origin or may have undergone whole genome duplication events.  
345 This is also suggested based on the large number of unigenes in *B. rotunda*, notably more than  
346 twice that of *Ensete glaucum*<sup>56</sup>, and 46,765 duplication events (65.8% of the *B. rotunda*  
347 genome, with at least 50% support). As noted in *Citrus limon*<sup>64</sup>, high levels of heterozygosity  
348 complicate the assembly process. Due to the clonal propagation nature of the fingerroot ginger,  
349 offspring resulting from the sexual hybridization is rather limited. Thus, we applied a similar  
350 approach as reported by Chin et al. (2016) and Baek et al. (2018), for the assembly of the *B.*  
351 *rotunda* genome<sup>65,66</sup>. The sequencing assembly of *B. rotunda* using long PacBio reads, in  
352 addition to the Illumina short-reads, and followed by assembly using FALCON assembler  
353 resulted in a scaffold number of 10,627. The relatively high scaffold number is not unexpected  
354 considering the high repeat content (72.51%) of the *B. rotunda* genome, coupled with the  
355 relatively high level of heterozygosity (3.01%), and the lack of any molecular marker and  
356 breeding data for *B. rotunda*. Future mapping and marker studies could help to resolve an  
357 assembly into the anticipated 18 chromosomes, as could more recent technologies such as  
358 single chromosome sequencing and optical mapping<sup>55</sup>.

359 Sequence information for other *Boesenbergia* species is not yet available, with the closest  
360 relative of *B. rotunda* from sequenced genomes at the time of our study being *M. acuminata*,  
361 based on previous analyses using amino acid data from single genes including chalcone  
362 isomerase (CHI)<sup>67</sup> and phytyltransferase (BrPT2)<sup>68</sup>. Our phylogeny analysis also showed *M.*  
363 *acuminata* as the closest relative among those compared, with *Z. mays*, *O. sativa*, *H. vulgare*,  
364 and *B. distachyon* from the Poaceae family, more distantly related, as expected.

365 The repeat content of the *B. rotunda* at ~72% of the assembled genome is high compared to  
366 many other plant genomes in this order such as *Musa itinerans* (38.95%)<sup>69</sup> and *M. acuminata*  
367 (35.43%)<sup>70</sup>, but similar to that of *Z. officinale* (ginger official) at 81%<sup>71</sup>. A higher level of  
368 repeat content has been observed to correlate with larger genome sizes in the Fabaceae<sup>72</sup> and  
369 *Melampodium*<sup>73</sup>. Both of those reports suggest the greater genome size to be largely driven by

370 Ty3/gypsy LTR-retrotransposons and it is interesting to note that *B. rotunda* also has a high  
371 LTR content of 64%. While data for genome sizes and content are not yet available for other  
372 Boesenbergia species, the *Z. officinale* genome has a similar high value of 61% LTR which  
373 was also suggested to contribute to the high genome size<sup>74</sup>. Studies in other plant species  
374 reported that plant genomes generally have over 50% transposable elements content (e.g.,  
375 maize) while some small plant genomes such as Arabidopsis may have as low as 10% repeat  
376 content<sup>75,76,77</sup>. Cytosine methylation is usually much denser in transposons than in genes<sup>78,79,80</sup>  
377 and this has also been correlated with evolution of genome size in angiosperms<sup>76</sup>. The large  
378 genome size and high repeat content of *B. rotunda* with relatively low gene body cytosine  
379 methylation levels of the genes selected for observation in the current study, fit well with this  
380 model and it will be interesting to compare this with other Boesenbergia species in the future  
381 when similar data becomes available.

382 As DNA methylation is dynamic, we saw variations in global DNA methylation levels in the  
383 different samples. Unmethylated DNA has been shown to demarcate expressed genes<sup>81</sup> and so  
384 to be able to examine this in the context of gene expression in *B. rotunda* and to add depth to  
385 our genome data, we included deep sequencing of leaf and callus transcriptomes from *B.*  
386 *rotunda*. There are several alternative tools for the *de novo* assembly of RNA-seq short reads  
387 into a reference transcriptome and we compared analysis from four assemblers. The quality of  
388 assembly was noticeably affected by both k-mer size and assembler tool, with Oases delivering  
389 the highest N50 size and average contig length at k-mer 21 compared to at k-mer 24 or other  
390 assemblers (Figure S4, Table 3), indicating more effective and accurate assembly. In  
391 comparison to a previous transcriptome assembly of *B. rotunda* by SOAPdenovo-Trans *de*  
392 *novo* assembler, our study obtained a longer N50 size (1,019) compared to an N50 value of 236  
393 reported by<sup>40</sup>. An Oases assembly of genome sequence data from a Fern, *Lygodium japonicum*  
394 was also found to give the best mean transcript length and N50 size when compared to  
395 assemblies using Trinity and SOAPdenovo-Trans<sup>82</sup>. The BUSCO assessment of *B. rotunda*  
396 transcriptome data also showed that Oases had higher numbers of complete and single copy  
397 contigs and less fragmented contigs. Based on this, the transcriptome assembly using Oases  
398 offered an improved resource for genome annotation and the gene expression study in *B.*  
399 *rotunda*.

400 We focused functional aspects of the *B. rotunda* genome study on the methylation and the  
401 flavonoid and phenylpropanoid pathways, as the chalcone, panduratin A, is considered one of  
402 the most promising bioactive compounds from *B. rotunda* and previous studies from our  
403 research group had indicated DNA methylation may influence gene expression in tissue

404 cultured materials<sup>83,84</sup>. From the 23 flavonoid and phenylpropanoid pathway genes that showed  
405 differential expression between leaf and any of the callus samples, most were more highly  
406 expressed in EC, DC, and WC, including *PAL*, *CHS*, *CHI*, *DFR*, *BGLU*, *HCT*, *CCOAOMT*,  
407 and *CAD* (Fig. 7) with highest expression level in the non-embryogenic callus (DC and WC).  
408 This aligns with previous Ultra Performance Liquid Chromatography-Mass Spectrometry  
409 (UPLC-MS) data showing WC followed by DC to have a higher concentration of panduratin,  
410 pinocembrin, pinostrobin, cardamonin and alpinetin<sup>42</sup>. Based on this, the unigenes identified  
411 in the genome assembly that correspond to *CHS* and *CHI*, encode key enzymes in the  
412 biosynthesis of panduratin A in *B. rotunda*. Although DNA methylation plays an important  
413 role in the regulation of gene expression, comparison of the methylation of the differentially  
414 expressed flavonoid and phenylpropanoid pathway genes, with their cytosine methylation  
415 showed no obvious patterns to indicate any correlation for this gene set.

416 As our samples included embryogenic and non-embryogenic callus tissue, we also evaluated  
417 the expression level of DNA methylase genes (*MET1*, *CMT3*, *DRM2*) and genes related to  
418 somatic embryogenesis (*SERK*, *BBM*, *LEC2*, *WUS*) with DNA methylation levels across the  
419 genome of *B. rotunda* based on bisulfite sequence analysis. An earlier study with some  
420 quantitative qRT-PCR validation suggested that the higher level of expression of  
421 methyltransferase-related genes and the lower CG, CHG and CHH sequence contexts in EC  
422 samples was negatively correlated with the total methylation level of DNA methyltransferase-  
423 related genes<sup>84</sup>. We did observe a similar pattern for *CMT3* in all five sample types in the  
424 current study (Fig. 7), however, no similar correlation between expression level and cytosine  
425 methylation was observed in the current data for the other genes examined. The lack of  
426 correlation between transcript expression and the respective gene body methylation from our  
427 data may be due to the limitations of the current genome assembly such that the cis regions  
428 could not be well annotated. In the future a higher resolution genome assembly for *B. rotunda*  
429 would be useful to examine the methylation data from the current study.

430 Although only a minor portion of the *B. rotunda* genome at around 0.35%, microsatellites are  
431 key elements in plant genomes. Among these, short sequence repeat microsatellites (SSRs)  
432 have found wide utility as co-dominant markers useful in breeding and diversity studies<sup>85,86</sup>.  
433 In this study, we identified genomic and EST-SSRs from *B. rotunda*, designing primers and  
434 showing several to have transferability to *Musa* and *Ensete* genomes, mostly *in silico* analysis,  
435 but with 14 tested in PCR experiments. *Boesenbergia*, *Musa* and *Ensete* are members of the  
436 same plant family *Zingiberales*, and all have abundant AT-rich SSR sequences, however they  
437 are not from the same genus, so are phylogenetically somewhat distanced as reflected in the

438 fairly low numbers with potential as markers across these species. Nevertheless, these newly  
439 developed SSR markers enhance the genetic resources for *B. rotunda* as well as the plant family  
440 *Zingiberales* and these markers could be utilized for genotyping, population structure analysis,  
441 association studies, cultivar identification as well as any other breeding application of the  
442 *Boesenbergia spp.*

443 In conclusion, the genome assembly of *B. rotunda* covers some 2,300 Mbp divided among 18  
444 relatively similar submetacentric chromosomes. The cultivated accession sequenced was  
445 highly heterozygous. The genome assembly, transcriptome, gene expression, SSR analysis and  
446 DNA methylation data from this study are resources that will allow further understanding of  
447 the unique secondary metabolite properties and their biosynthetic pathways in the genus  
448 *Boesenbergia* and for functional genomics of *B. rotunda* characteristics, evolution of the ginger  
449 plant family and potential genetic selection or improvement of gingers.

450

## 451 **Materials and methods**

452

### 453 **Ethics**

454 The conduct of this research was approved by the grant management committee of the  
455 University of Malaya, headed by the Director of the Institute of Research Management and  
456 Monitoring, Professor Noorsaadah Abdul Rahman (noorsaadah@um.edu.my) and did not  
457 involve the use of any human, animal, or endangered or protected plant species as materials.

458

### 459 **Plant materials and establishment of *in vitro* samples**

460 Rhizomes of *B. rotunda* (L.) Mansf. were obtained from a commercial farm in Temerloh,  
461 Pahang, Malaysia (Latitude: 3.27° N, Longitude: 102.25° E) and propagated in the laboratory  
462 to generate all sample materials following methods described by Karim et al. (2018b)<sup>84</sup>.  
463 Initially, the plants were washed thoroughly under running tap water for 10 min, then air dried  
464 for 30 min before insertion into black polybags to promote sprouting. Samples were sprayed  
465 with water every day to induce growth of shoots and leaves. The samples included young *ex*  
466 *vitro* leaf (EVL) samples, collected from rhizome-derived plants at four weeks after potting;  
467 Callus samples cultured from meristematic block explants subcultured on MS medium  
468 supplemented with 30 g L<sup>-1</sup> sucrose and 2 g L<sup>-1</sup> Gelrite® with 2,4-dichlorophenoxy acetic  
469 acid (2,4-D) at concentrations of 1 mg L<sup>-1</sup> (4.5 µM) for watery callus (WC), 3 mg L<sup>-1</sup> (13.5  
470 µM) for embryogenic callus (EC) and 4 mg L<sup>-1</sup> (18 µM) for dry callus (DC). The WC, EC and

471 DC samples were collected after four weeks on the respective media (8 weeks after initial  
472 culturing from explant). *In vitro* leaves (IVL) from plants regenerated from embryogenic calli  
473 placed on regeneration media (MS0) were collected after 8 weeks (16 weeks after initial  
474 culturing from meristematic block explants)<sup>83</sup>.

475

#### 476 **DNA extraction and sequencing for genome and bisulfite sequence (BS-seq) analysis**

477 Total genomic DNA was extracted using a modified cetyl trimethyl ammonium bromide  
478 (CTAB) method from *ex vitro* leaf (EVL) of *B. rotunda*<sup>87</sup>. The quality and quantity of extracted  
479 DNA were determined by measuring the absorbance at A260nm and A280nm using a  
480 NanoDrop 2000 Spectrophotometer (Thermo Fisher Scientific Inc., Waltham, MA, USA) and  
481 Qubit® 2.0 Fluorometer (Thermo Fisher Scientific Inc., Waltham, MA, USA). The DNA  
482 sample was sent to BGI Shenzhen (Shenzhen, China) for library construction and *de novo*  
483 sequencing on the Illumina HiSeq2000 and HiSeq2500 platform (Illumina Inc., San Diego,  
484 CA, USA) and the PacBio RS II platform (PacBio Inc., CA, USA). Different insert size (bp)  
485 libraries were prepared using the best quality DNA samples with an A260nm/A280nm ratio  
486 between 1.7–1.9. For library construction, DNA was fragmented, end repaired, 3'A tailed,  
487 adapter ligated, and amplified by PCR<sup>88</sup>. For BS sequence analysis, genomic DNA of *B.*  
488 *rotunda ex vitro* leaf (EVL), embryogenic callus (EC), dry callus (DC), watery callus (WC),  
489 and *in vitro* leaf of regenerated plants (IVL) were sequenced after being treated by sodium  
490 bisulfite. The sequencing was carried out by a commercial service provider, Sengenics Sdn.  
491 Bhd., Malaysia. A total of five samples (three biological replicates for each of five samples)  
492 were sequenced to generate paired-end reads using an Illumina HiSeq™ 2000 platform  
493 (Illumina Inc., San Diego, CA, USA) according to the manufacturer's instructions.

494

#### 495 **RNA extraction and sequencing for transcriptome (RNA-seq) analysis**

496 Total RNA was isolated from *ex vitro* leaf (EVL), embryogenic callus (EC), dry callus (DC),  
497 watery callus (WC), and *in vitro* leaf of regenerated plants (IVL) using a modified cetyl  
498 trimethyl ammonium bromide (CTAB) method<sup>89</sup>. Three independent rounds of RNA (n = 3)  
499 were prepared for each sample. Total RNA was measured using a NanoDrop 2000  
500 Spectrophotometer (Thermo Fisher Scientific Inc., Waltham, MA, USA) and RNA integrity  
501 was determined using an Agilent 2100 Bioanalyzer (Agilent Technologies Inc., CA, USA).  
502 RNA samples with absorbance ratios A260nm/A280nm ranging from 1.8 to 2.2, and an  
503 A260nm/A230nm ratio higher than 1.0 and an RNA integrity number (RIN) higher than 7.0,

504 were sent to BGI-Shenzhen (Shenzhen, China) for library construction and sequencing on the  
505 using Illumina Genome Analyzer IIx (GAIIx) platform (Illumina Inc., San Diego, CA, USA)  
506 to generate single-end reads.

507

508 **Determination of chromosome number and location of 45S and 5S rDNA sites on**  
509 **metaphase chromosomes of *B. rotunda* (2n=36) using fluorescent in situ hybridization**  
510 **(FISH)**

511 The FISH procedure was adapted to Schwarzacher and Heslop-Harrison (2000)<sup>90</sup>. ‘Fingers’ of  
512 *B. rotunda* were placed in shallow dishes with soil to initiate root growth and kept in the  
513 glasshouse at the University of Leicester, UK. Newly grown roots tips of 1-2cm length were  
514 treated with 2 mM 8-hydroxyquinoline at growth temperature for 2 hours followed by  
515 incubation overnight at 4°C, and then fixed with 96% ethanol:glacial acetic acid (3:1). Roots  
516 were digested for 1-3h at 37°C with a mixture of cellulose (32U/ml, Sigma-Aldrich C1184),  
517 ‘Onozuka’ RS cellulose (20U/ml), pectinase (from *Aspergillus niger*, Sigma-Aldrich P4716)  
518 and Viscozyme (20U/ml, Sigma-Aldrich V2010) in 10mM citric acid/sodium citrate buffer  
519 (pH4.6). Chromosome preparations of dissected meristems were made in 60% acetic acid by  
520 squashing under a cover slip. Slides were stored at -20°C until FISH.

521 The 45S rDNA and 5S rDNA probe were labelled by random priming (Invitrogen) with  
522 digoxigenin 11-dUTP or biotin 11-dUTP (Roche) using the linearised clone pTa71 (from  
523 *Triticum aestivum*, Gerlach and Bedbrook 1979) or the PCR amplified insert of clone pTa794  
524 (from *T. aestivum*, Gerlach and Bedbrook 1979), respectively<sup>91</sup>. For hybridization, 50-100ng  
525 of labelled probe were prepared in 40-50µl mixture of 40% (v/v) formamide, 20% (w/v)  
526 dextran sulphate, 2x SSC (sodium chloride sodium citrate), 0.03µg of salmon sperm DNA,  
527 0.12% SDS (sodium dodecyl sulphate) and 0.12mM EDTA (ethylenediamine-tetra acetic acid).  
528 Chromosomes and probe mixture were denatured together at 70°C for 6-8 mins, before cooling  
529 down slowly to 37°C and hybridized for 16h at 37°C. Slides were washed at 42°C in 0.1xSSC  
530 and hybridization sites were detected with anti-digoxigenin-FITC (2µg/ml; Roche) and  
531 Streptavidin-Alexa594 (1µg/ml; Molecular Probes). Chromosomes were counterstained with  
532 DAPI (4’,6-diamidino-2-phenylindole, 4µg/ml) and mounted in CitifluorAF. Slides were  
533 examined with a Nikon Eclipse 80i microscope and images were captured using NIS-Elements  
534 v2.34 (Nikon, Tokyo, Japan), and a DS-QiMc monochrome camera. Images were  
535 pseudocoloured and final figures were prepared with Adobe Photoshop CC2018 using  
536 enhancements that treat all pixels of the image<sup>90</sup>.



### 537 **k-mer analysis for genome size estimation**

538 The genome size of *B. rotunda* was estimated based on the flow cytometry and K-mer analysis.  
539 We determined the genome size (G) of *B. rotunda* as an unknown sample with flow cytometry  
540 on a MACSQuant Analyzer (Miltenyl Biotec Inc., BG, Germany), using soybean (*Glycine max*  
541 *cv. Polanka* (G) 2C = 2.50 pg DNA) and Pea (*Pisum sativum cv. Ctirad* (P) 2C = 9.09 pg DNA)  
542 as internal standards and propidium iodide as the stain. Each plant (sample and comparator)  
543 was compared using an average of four biological replicates<sup>52,92,93</sup>. We also performed K-mer  
544 analysis to estimate the *B. rotunda* genome size and heterozygosity rate using Jellyfish<sup>94</sup> and  
545 GenomeScope<sup>95</sup>.

546

### 547 **Genome assembly**

548 A combination of sequencing technologies of PacBio RSII platform, Illumina HiSeq 2500  
549 paired-end reads (PE) with 450bp insert size library, and Illumina HiSeq 2000 mate-pair reads  
550 (MP) with insert size libraries of 2, 5, 10, 20, and 40kb was performed for genome  
551 assembly. Before assembly, Illumina HiSeq sequence reads were filtered by removing adaptors  
552 and low-quality nucleotides. PacBio reads were filtered to remove the short reads of less than  
553 500bp or a quality score lower than 0.8, then error correction for the long reads done by  
554 FALCON<sup>96</sup>, following the general principles proposed by<sup>97</sup>. We have tried to use several *de*  
555 *novo* assemblers to construct the assembly with both Illumina and PacBio reads. Finally, we  
556 chose the SMARTdenovo<sup>98</sup>. Corrected PacBio reads were assembled with SMARTdenovo  
557 software (<https://github.com/ruanjue/smarddenovo>) to construct contigs. For PacBio data,  
558 constructed contigs were subsequently polished by stand-alone consensus modules,<sup>97</sup> and  
559 Pilon software<sup>99</sup> for Illumina PE reads. Polished contigs were used as input for scaffolding.  
560 Scaffolds were constructed by SOAP scaffolding, SSPACE tool<sup>100</sup> with Illumina mate-pair  
561 reads (2k-40k) with default parameters to extend the length of scaffolds for the raw assembly.  
562 The gaps within scaffolds, consensus sequences generated from PacBio sub-reads were filled  
563 using PBJelly2<sup>101</sup>. Finally, the scaffolds were corrected by Pilon<sup>99</sup> with Illumina PE reads to  
564 correct the assembly errors and obtained final genome assembly.

565

### 566 **Genome assembly quality assessment**

567 The completeness of the assembly was tested by searching for 1440 core eukaryotic genes  
568 using Benchmarking Universal Single-Copy Orthologs (BUSCO) (v2.0)<sup>60</sup>. To assess the

569 quality of the genome assembly, the Illumina paired-end 250bp read data was mapped to the  
570 contig using BWA-MEM (version 0.7.15-r1142) <sup>102</sup>.

571

### 572 **Repeat annotation**

573 Tandem repeats were identified with tandem repeat finder (TRF) <sup>103</sup> (version 4.0.4).  
574 Transposable elements (TE) were identified with integrated homology-based and *de novo*  
575 methods <sup>52</sup>. Homology-based prediction was done at the DNA and protein levels by comparing  
576 the assembly to the RepBase v.20.04 <sup>104</sup> database as a query library using RepeatMasker v.4.0.7  
577 (<http://www.repeatmasker.org/>) and ProteinRepeatMask v.4.0.7  
578 (<http://www.repeatmasker.org/>). To search those absent TEs in RepBase library, *de novo* repeat  
579 library was constructed using RepeatModeler v.1.0.10 (<http://www.repeatmasker.org/>) to run  
580 against *B. rotunda* genome assembly using RepeatMasker v.4.0.7  
581 (<http://www.repeatmasker.org/>).

582

### 583 **Gene annotation**

584 Three approaches were employed in gene prediction: Homolog, *de novo*, and RNA-Seq. For  
585 generation of homology-based predictions, the gene sets from four species i.e. *M. acuminata*  
586 (<http://www.promusa.org/Musa+acuminata>), *P. dactylifera*, *O. sativa*  
587 (<http://rice.plantbiology.msu.edu/>) and *A. thaliana* (<https://www.arabidopsis.org/>) were  
588 downloaded. The nonredundant protein sequences for each gene set was searched by  
589 TBLASTN. For generation of expression-based evidence, RNA-seq short reads originating  
590 from *ex vitro* leaf (EVL), *in vitro* leaf (IVL), embryogenic callus (EC), dry callus (DC) and  
591 watery callus (WC) tissues were mapped to the ginger genome with Hisat2 v.2.0.4 <sup>105</sup> alignment  
592 program. For *de novo* gene annotation, transcripts well-supported i.e., identified both by the  
593 homology-based and the RNA-seq based predictions were selected for *ab initio* prediction  
594 using AUGUSTUS v.3.2.3 <sup>106,107</sup>. The exon-intron structure of the genes was predicted using,  
595 Genscan <sup>108</sup> and SNAP <sup>109</sup>. The results from the three approaches were consolidated using  
596 MAKER v.2.31.9 <sup>110</sup> to generate a protein-coding gene set. For functional information, *in silico*  
597 translated products of coding genes were aligned to seven known protein databases of NR <sup>111</sup>,  
598 InterPro <sup>112</sup>, GO <sup>113</sup>, KEGG <sup>114</sup>, Swissprot and TrEMBL <sup>115</sup>, COG <sup>116</sup>.

599

600

601

## 602 **ncRNA annotation**

603 Four types of ncRNA were annotated in the assembled genome including microRNA (miRNA),  
604 transfer RNA (tRNA), ribosomal RNA (rRNA), and small nuclear RNA (snRNA). Non-coding  
605 RNAs were annotated based on *de novo*/or homology search methods. The tRNAs genes were  
606 annotated using tRNAScan-SE v.1.3.1<sup>117</sup> with default parameters and filtered to remove  
607 pseudo annotated tRNA genes. To identify rRNA genes, the *B. rotunda* genome assembly  
608 searched against rRNA template sequences (Rfam database, release 13.0)<sup>118</sup> of *A. thaliana*, *O.*  
609 *sativa*, and *M. acuminata* with BLASTN with an identity cutoff of  $\geq 90\%$  and a coverage at  
610 80% or more. Using Infernal v.1.1.2<sup>119</sup>, mapping of the *B. rotunda* genome sequences to the  
611 Rfam database was done to identify miRNA and snRNA genes<sup>52,88</sup>.

612

## 613 **Construction of phylogenetic trees**

614 The conserved orthologs genes (COS) in *B. rotunda* genome and 13 other species were  
615 identified using Orthofinder program<sup>61</sup>. Using identified single-copy orthologous genes a  
616 neighbour joining (NJ) tree was constructed using MEGAX<sup>120</sup> and UpSet plot using UpSetR  
617<sup>121</sup>.

## 618 **Gene family expansion and contraction analysis**

619 To identify gene family expansion and contraction, we used the data generated from  
620 OrthoFinder as inputs for the Computational Analysis of gene Family Evolution (CAFE)<sup>122</sup>.  
621 The phylogenetic tree from OrthoFinder was converted to an ultrametric tree using  
622 `make_ultrametric.py` in OrthoFinder. Gene families with large variance ( $\geq 100$  gene copies)  
623 were removed using `clade_and_size_filter.py` in CAFE package. Divergence times in the  
624 phylogenetic tree were estimated using PATHd8<sup>123</sup> calibrated using divergence time between  
625 *Brachypodium* and *Oryza* (40–45 million years ago) (The International Brachypodium  
626 Initiative 2010)<sup>124</sup> and *Arabidopsis* and *Oryza* (130–200 million years ago)<sup>125</sup>. CAFE version  
627 5<sup>122</sup> was used to determine the stochastic birth and death processes and for modelling of the  
628 gene family evolution. The parameters for CAFE5 is “`cafe5 -i orthofinder_gene_families.txt -`  
629 `t orthofinder_ultrametric.tre -p -e`”.

630

## 631 **DNA methylation analysis using bisulfite sequencing (BS-seq)**

632 Bisulfite sequencing reads were pre-processed by trimming low quality reads and adapters by  
633 Trim-Galore<sup>126</sup> tool specific for bisulfite sequencing. After trimming, bisulfite reads were  
634 mapped to draft ginger genome with Bismark<sup>127</sup> tool by choosing bowtie aligner with options

635 set to best, minimum map length of 50 bp and insert size of 500bp. Mapping duplicates were  
636 removed by Methpipe<sup>128</sup> tool. Methcounts program from Methpipe was used for mapping of  
637 methylated and unmethylated cytosines where the methylation level at single base resolution  
638 was calculated based on the number of 5-methylated cytosines (5mC) in reads, divided by the  
639 sum of the C and thymines (T) in CG, CHG and CHH sequence contexts within the coding  
640 sequences of all selected genes from *B. rotunda*.

641

#### 642 ***De novo* transcriptome assembly of *B. rotunda* and functional annotation**

643 To gather information related to secondary metabolites, expression of genes involved in  
644 flavonoid and phenylpropanoid pathways of *B. rotunda* was based on deep transcriptome  
645 sequencing of three cell culture types, *in vitro* and *ex vitro* leaves of *B. rotunda*. Based on our  
646 previous studies of embryogenesis related genes<sup>83,84</sup> and on levels of metabolites in cell  
647 cultures<sup>42</sup>, we generated deep transcriptome data from five tissue types (each three replicates)  
648 to investigate gene regulation patterns in the phenylpropanoid and flavonoid pathways to  
649 identify metabolite producing cells in *B. rotunda in vitro* cultured cells. RNA-seq reads were  
650 pre-processed using FastQC software  
651 (<https://www.bioinformatics.babraham.ac.uk/projects/fastqc/>) to remove poor quality reads  
652 and adapter sequences. The remaining high-quality reads were assembled into contigs using  
653 four commonly used short-read assemblers: Oases<sup>129</sup>; TransABySS<sup>130</sup>; SOAPdenovo-Trans  
654<sup>131</sup> and Trinity<sup>132</sup>. Two different approaches were used to assemble the transcriptome. In the  
655 first approach (best k-mer strategy) high-quality reads were assembled at different k-mer length  
656 21–51 using Oases, TransABySS and SOAPdenovo-Trans whereas the assembly by Trinity  
657 used default parameters (K-mer 25). The assemblies from each software in the first approach  
658 were further used in the second approach (additive k-mer followed by TGICL) in order to  
659 improve the transcriptome assemblies. A two-step strategy was employed for assembly in the  
660 second approach in which the contigs generated from all the k-mers by each respective  
661 assembler were merged and redundancy was removed using CD-HIT<sup>133</sup>. The remaining non-  
662 redundant contigs were assembled using TGICL clustering tool<sup>134</sup> with a maximum identity  
663 of 90 and a minimum overlap length of 40. The completeness of the transcriptome assemblies  
664 was measured using the BUSCO<sup>60</sup> software.

665 High-throughput functional annotation was performed with Blast2GO Command Line<sup>135</sup>. To  
666 obtain a list of potential homologous for each input sequence, BLAST algorithm (BLASTX)  
667 was performed. Blast2GO then maps Gene Ontology (GO) terms associated with the obtained

668 BLAST hits and returns an evaluated functional annotation for the query sequences<sup>136</sup>. GO  
669 mapping and Enzyme Commission (EC) classification were done based on annotation Cut-off  
670 55, E-Value-Hit-Filter  $1 \times 10^{-6}$ , GO Weight of 5, and HSP-Hit Coverage Cut-off 0. The  
671 functional enrichment categories among the differentially expressed genes (DEG) were  
672 identified by a Fisher exact test with false discovery rate (FDR) cut-off of 0.05. Classification  
673 of the *B. rotunda* transcripts into functional categories was performed using the Eukaryotic  
674 Orthologous Groups (KOG)<sup>116</sup> protein database. *B. rotunda* transcripts were mapped to their  
675 biological pathways using the Kyoto Encyclopedia of Genes and Genomes (KEGG) database  
676<sup>137</sup>. Unigenes potentially related to Panduratin A and other secondary metabolites biosynthesis  
677 were identified as those with a unigene annotated function matching to enzymes assigned to  
678 the flavonoid and phenylpropanoid biosynthetic pathways in the KEGG pathway database.

679

#### 680 **Estimation of transcript abundance and differential expression**

681 RSEM software package<sup>138</sup> was used for the estimation of the gene expression level with mean  
682 fragment length of 200 bp and fragment length standard deviation of 80 bp. The FPKMs  
683 (fragments per feature kilobase per million reads mapped) were used to normalize the  
684 expression level for each gene and comparison between samples. Bioconductor tool (EdgeR)  
685<sup>139</sup> was used for differential expression analysis with a *P*-value threshold of  $\leq 0.05$  and  $|\log_2$   
686 (Fold Change)|  $\geq 1$  used to identify significant differential expression of the transcripts.

687

#### 688 **Mining of simple sequence repeats from *B. rotunda* transcriptome and genome assembly**

689 Whole genome assembly and assembled transcriptome sequences were searched for SSRs  
690 using a modified Liliaceae simple sequence analysis tool (LSAT) pipeline<sup>140</sup>. Searches were  
691 standardized for mining SSRs from mono to 20 bp with minimum repeat loci of 12 nucleotides.  
692 SSRs were classified based on SSR locus length (Class I >20nt and Class II 12-20nt) and  
693 nucleotide base composition of the SSR loci (AT-rich, GC-rich and AT-GC balance). Primer  
694 pair sequences were developed for each identified SSR loci using the default parameters of the  
695 primer 3 (<http://bioinfo.ut.ee/primer3>) software<sup>141</sup>. Redundant primers pair were eliminated  
696 using perl script developed by Biswas et al<sup>86</sup>. An electronic polymerase chain reaction (ePCR)  
697<sup>142</sup> strategy was applied for mapping and estimating the transferability of the designed primers.  
698 Primers were mapped on four genomes viz. *Musa acuminata*, *Musa balbisiana*, *Musa itinerans*  
699 and *Ensete ventricosum* those are the most related plant species of the *B. rotunda*. Maximum  
700 2nt mismatch with two gaps was set as a cut off value for ePCR result filter.

701 **Wet lab validation of the transcriptome SSR (EST-SSR) and genomic SSR (G-SSR)**  
702 **markers**

703 A total 14 (8 EST-SSR and 6 G-SSR) primer pairs were selected based on their *in silico*  
704 transferability result to assess their marker potentiality. Three *B. rotunda*, two *Ensete* and three  
705 *Musa* species were used to validate selected primer sets. Fresh leaf samples were harvested  
706 from the greenhouse grown plants and total genomic DNA was extracted following the CTAB  
707 methods. PCR amplifications were carried out for SSR primer validation under the following  
708 conditions: 95 °C for 2 min, 35 cycles at 95 °C for 1 min, 60 °C for 1 min, and 72 °C for 1 min,  
709 followed by a final elongation at 72 °C for 10 min. Amplified DNA fragments were run on 2%  
710 agarose gels in 1 × Tris–Borate-EDTA (TBE) buffer with 80v for 90 min. A 100-bp molecular  
711 ladder was used to estimate the amplicon size.

712 **Acknowledgements**

713 The work was supported by the High Impact Research Chancellery Grant  
714 UM.C/625/1/HIR/MOE/SC/15 from the University of Malaya, Kuala Lumpur, Malaysia. We  
715 acknowledge our colleagues at the Centre for Research in Biotechnology for Agriculture  
716 (CEBAR) and the Plant Biotechnology Research Laboratory (PBRL), University of Malaya  
717 and from the Department of Genetics and Genome Biology, University of Leicester, for their  
718 kind support and guidance during this research and CEBAR grants TU002G-2018 and  
719 RU004A-2020 (for support in research facilities and maintenance).

720 **Author contributions**

721 Jennifer Ann Harikrishna, Norzulaani Khalid, J. S. (Pat) Heslop-Harrison and Trude  
722 Schwarzacher, conceived and designed the study. Sima Taheri, Teo Chee How, Tan Yew  
723 Seong, Manosh Kumar Biswas, Naresh V. R. Mutha, Wee Wei Yee and Gan Han Ming,  
724 performed the data acquisition, genome sequence assembly and bioinformatics analyses. Trude  
725 Schwarzacher and Yusmin Mohd Yusuf performed the chromosome analysis. Sima Taheri,  
726 Teo Chee How, Jennifer Ann Harikrishna and J. S. (Pat) Heslop-Harrison wrote the manuscript.  
727 All authors assisted with editing of the manuscript and approved the final version.

728 **Availability of data**

729 Raw sequence data used for genome assembly, mRNA sequencing (RNA-Seq) and whole-  
730 genome bisulfite sequencing (BS-Seq) are available at NCBI under BioProject ID  
731 PRJNA712941.

732 **Conflicts of interest**

733 The authors declare that they have no conflicts of interest.

734

735

736 **References**

737

738 1. Benedict, J.C. *et al.* Species diversity driven by morphological and ecological disparity:  
739 a case study of comparative seed morphology and anatomy across a large monocot  
740 order. *AoB Plants* **8**, plw063 (2016).

741 2. Christenhusz, M.J. & Byng, J.W. The number of known plants species in the world and  
742 its annual increase. *Phytotaxa* **261**, 201-217 (2016).

743 3. Baker, J.G. The Flora of British India in Scitamineae Vol. 6 (ed Hooker, J.D.) (Reeve  
744 & Co., 1890).

745 4. Burkill, I.H. A dictionary of the economic products of the Malay Peninsula. in *A*  
746 *Dictionary of the Economic Products of the Malay Peninsula*. Vol. 2 (1966).

747 5. Larsen, K. A preliminary checklist of the Zingiberaceae of Thailand. *Thai Forest*  
748 *Bulletin (Botany)* 35-49 (1996).

749 6. Larsen, K., Ibrahim, H., Khaw, S. & Saw, L. Gingers of peninsular Malaysia and  
750 Singapore (Natural History 1999).

751 7. Rachkeeree, A. *et al.* Nutritional compositions and phytochemical properties of the  
752 edible flowers from selected Zingiberaceae found in Thailand. *Front. nutr.* **5**, 1-10  
753 (2018).

754 8. Jing, L.J., Mohamed, M., Rahmat, A. & Bakar, M.F.A. Phytochemicals, antioxidant  
755 properties and anticancer investigations of the different parts of several gingers species  
756 (*Boesenbergia rotunda*, *Boesenbergia pulchella* var *attenuata* and *Boesenbergia*  
757 *armeniaca*). *J. Med. Plant Res.* **4**, 027-032 (2010).

758 9. Larsen, K., Lock, J., Maas, H. & Maas, P. Zingiberaceae in Flowering Plants-  
759 Monocotyledons 474-495 (Springer, 1998).

760 10. Mood, J., Veldkamp, J., Dey, S. & Prince, L. Nomenclatural changes in Zingiberaceae:  
761 *Caulokaempferia* is a superfluous name for *Monolophus* and *Jirawongsea* is reduced to  
762 *Boesenbergia*. *Bull. Singapore* **66**, 215-231 (2014).

763 11. Eng-Chong, T. *et al.* *Boesenbergia rotunda*: From ethnomedicine to drug discovery.  
764 *Evid. Based Complementary Altern. Med.* **2012**, 25 (2012).

765 12. Jirakiattikul, Y., Rithichai, P., Prachai, R. & Itharat, A. Elicitation enhancement of  
766 bioactive compound accumulation and antioxidant activity in shoot cultures of  
767 *Boesenbergia rotunda* L. *Agric. Nat. Resour* **55**, 456-463 (2021).

768 13. Trakoontivakorn, G. *et al.* Structural analysis of a novel antimutagenic compound, 4-  
769 hydroxypanduratin A, and the antimutagenic activity of flavonoids in a Thai spice,

- 770 fingerroot (*Boesenbergia pandurata* Schult.) against mutagenic heterocyclic amines. *J.*  
771 *Agric. Food Chem.* **49**, 3046-3050 (2001).
- 772 14. Jaipetch, T. *et al.* Constituents of *Boesenbergia pandurata* (syn. *Kaempferia pandurata*):  
773 isolation, crystal structure and synthesis of (±)-Boesenbergin A. *Aust. J. Chem.* **35**, 351-  
774 361 (1982).
- 775 15. Tan, S.K. Flavanoids from *Boesenbergia Rotunda* (L.) Mansf: Chemistry, Bioactivity  
776 and Accumulation. in *Department of Chemistry* Vol. Doctoral dissertation 694  
777 (Universiti Malaya, Malaysia, 2005).
- 778 16. Tan, B.C. *et al.* Distribution of flavonoids and cyclohexenyl chalcone derivatives in  
779 conventional propagated and in vitro-derived field-grown *Boesenbergia rotunda* (L.)  
780 Mansf. *Evid. Based Complementary Altern. Med.* **2015**, 1-7 (2015).
- 781 17. Yusuf, N.A., M Annuar, M.S. & Khalid, N. Existence of bioactive flavonoids in  
782 rhizomes and plant cell cultures of *Boesenbergia rotunda* (L.) Mansf. *Kulturpfl. Aust. J.*  
783 *Crop Sci.* **7**, 730 (2013).
- 784 18. Rosdianto, A.M., Puspitasari, I.M., Lesmana, R. & Levita, J. Determination of  
785 Quercetin and Flavonol Synthase in *Boesenbergia rotunda* Rhizome. *Pak. J. Biol. Sci.*  
786 **23**, 264-270 (2020).
- 787 19. Ching, A.Y.L. *et al.* Characterization of flavonoid derivatives from *Boesenbergia*  
788 *rotunda* (L.). *Malaysian J. Anal. Sci.* **11**, (2007).
- 789 20. Tuchinda, P. *et al.* Anti-inflammatory cyclohexenyl chalcone derivatives in  
790 *Boesenbergia pandurata*. *Phytochemistry* **59**, 169-173 (2002).
- 791 21. Rosdianto, A.M., Puspitasari, I.M., Lesmana, R. & Levita, J.J.J.o.A.P.S. Bioactive  
792 compounds of *Boesenbergia* sp. and their anti-inflammatory mechanism: A review. *J.*  
793 *Appl. Pharm. Sci.* **10**, 116-126 (2020).
- 794 22. Kirana, C., Jones, G.P., Record, I.R. & McIntosh, G.H. Anticancer properties of  
795 panduratin A isolated from *Boesenbergia pandurata* (Zingiberaceae). *J. Nat. Med.* **61**,  
796 131-137 (2007).
- 797 23. Liu, Q. *et al.* Panduratin A inhibits cell proliferation by inducing G0/G1 phase cell cycle  
798 arrest and induces apoptosis in breast cancer cells. *Biomol. Ther.* **26**, 328 (2018).
- 799 24. Tanigaki, R. *et al.* 4-Hydroxypanduratin A and isopanduratin A inhibit tumor necrosis  
800 factor  $\alpha$ -stimulated gene expression and the nuclear factor  $\kappa$ B-dependent signaling  
801 pathway in human lung adenocarcinoma A549 cells. *Biol. Pharm. Bull.* **42**, 26-33  
802 (2019).
- 803 25. Win, N.N., Awale, S., Esumi, H., Tezuka, Y. & Kadota, S. Panduratin D—I, novel  
804 secondary metabolites from rhizomes of *Boesenbergia pandurata*. *Chem. Pharm. Bull.*  
805 **56**, 491-496 (2008).
- 806 26. Break, M.K.B. *et al.* Cytotoxic Activity of *Boesenbergia rotunda* Extracts against  
807 Nasopharyngeal Carcinoma Cells (HK1). Cardamonin, a *Boesenbergia rotunda*



- 808 Constituent, Inhibits Growth and Migration of HK1 Cells by Inducing Caspase-  
809 Dependent Apoptosis and G2/M-Phase Arrest. *Nutr. Cancer* **73**, 473-483 (2021).
- 810 27. Cheenpracha, S. *et al.* Anti-HIV-1 protease activity of compounds from *Boesenbergia*  
811 *pandurata*. *Bioorg. Med. Chem.* **14**, 1710-1714 (2006).
- 812 28. Kiat, T.S. *et al.* Inhibitory activity of cyclohexenyl chalcone derivatives and flavonoids  
813 of fingerroot, *Boesenbergia rotunda* (L.), towards dengue-2 virus NS3 protease. *Bioorg.*  
814 *Med. Chem. Lett.* **16**, 3337-3340 (2006).
- 815 29. Chee, C.F., Abdullah, I., Buckle, M.J. & Rahman, N.A. An efficient synthesis of (±)-  
816 panduratin A and (±)-isopanduratin A, inhibitors of dengue-2 viral activity.  
817 *Tetrahedron Lett.* **51**, 495-498 (2010).
- 818 30. Kanjanasirirat, P. *et al.* High-content screening of Thai medicinal plants reveals  
819 *Boesenbergia rotunda* extract and its component Panduratin A as anti-SARS-CoV-2  
820 agents. *Sci. Rep.* **10**, 1-12 (2020).
- 821 31. Hwang, J.-K., Chung, J.-Y., Baek, N.-I. & Park, J.-H. Isopanduratin A from *Kaempferia*  
822 *pandurata* as an active antibacterial agent against cariogenic *Streptococcus mutans*. *Int.*  
823 *J. Antimicrob. Agents* **23**, 377-381 (2004).
- 824 32. Mazlan, R.R., Zakaria, M. & Rukayadi, Y. Antimicrobial activity of fingerroot  
825 [*Boesenbergia rotunda* (L.) Mansf. A.] Extract against *Streptococcus mutans* and  
826 *streptococcus sobrinus*. *J. Pure. Appl. Microbiol.* **10**, 1755-1762 (2016).
- 827 33. Bhamarapavati, S., Juthapruth, S., Mahachai, W. & Mahady, G. Antibacterial activity  
828 of *Boesenbergia rotunda* (L.) Mansf. and *Myristica fragrans* Houtt. against *Helicobacter*  
829 *pylori*. *Songklanakarin J. Sci. Technol.* **28**, 157-163 (2006).
- 830 34. Pattaratanawadee, E., Rachtanapun, C., Wanchaitanawong, P. & Mahakarnchanakul,  
831 W. Antimicrobial activity of spice extracts against pathogenic and spoilage  
832 microorganisms. *Kasetsart J Nat Sci* **40**, 159-165 (2006).
- 833 35. Hwang, J.K., Kim, S.Y. & Kim, M.B. Composition comprising panduratin or fingerroot  
834 (*boesenbergia pandurata*) extract for treating, preventing, or ameliorating bone loss  
835 disease. U.S. Patent Application No. 16/115,018. (ed. Newtree Co., L., , Seongnam)  
836 (Korea, 2019).
- 837 36. Adhikari, D. *et al.* Vasorelaxant Effect of *Boesenbergia rotunda* and Its Active  
838 Ingredients on an Isolated Coronary Artery. *Plants* **9**, 1688 (2020).
- 839 37. Tan, S. *et al.* Simple one-medium formulation regeneration of fingerroot [*Boesenbergia*  
840 *rotunda* (L.) Mansf. Kulturpfl.] via somatic embryogenesis. *In Vitro Cell. Dev. Biol.*  
841 *Plant* **41**, 757-761 (2005).
- 842 38. Wong, S.M., Salim, N., Harikrishna, J.A. & Khalid, N. Highly efficient plant  
843 regeneration via somatic embryogenesis from cell suspension cultures of *Boesenbergia*  
844 *rotunda*. *In Vitro Cell. Dev. Biol. - Plant* **49**, 665-673 (2013).

- 845 39. Yusuf, N.A., Annuar, M.S. & Khalid, N. Rapid micropropagation of *Boesenbergia*  
846 *rotunda* (L.) Mansf. Kulturpfl.(a valuable medicinal plant) from shoot bud explants.  
847 *Afr. J. Biotechnol.* **10**, 1194-1199 (2011).
- 848 40. Md-Mustafa, N.D. *et al.* Transcriptome profiling shows gene regulation patterns in a  
849 flavonoid pathway in response to exogenous phenylalanine in *Boesenbergia rotunda*  
850 cell culture. *BMC Genomics* **15**, 984 (2014).
- 851 41. Wu, M., Li, Q., Hu, Z., Li, X. & Chen, S. The complete *Amomum kravanh* chloroplast  
852 genome sequence and phylogenetic analysis of the commelinids. *Molecules* **22**, 1875  
853 (2017).
- 854 42. Ng, T.L.M. *et al.* Amino acid and secondary metabolite production in embryogenic and  
855 non-embryogenic callus of Fingerroot ginger (*Boesenbergia rotunda*). *PloS one* **11**,  
856 e0156714 (2016).
- 857 43. Chen, D.-x. *et al.* The chromosome-level reference genome of *Coptis chinensis*  
858 provides insights into genomic evolution and berberine biosynthesis. *Hort. Res.* **8**,  
859 (2021).
- 860 44. Xia, Z. *et al.* Chromosome-scale genome assembly provides insights into the evolution  
861 and flavor synthesis of passion fruit (*Passiflora edulis* Sims). *Hort. Res.* **8**, (2021).
- 862 45. Xu, X. *et al.* The chromosome-level *Stevia* genome provides insights into steviol  
863 glycoside biosynthesis. *Hort. Res.* **8**, (2021).
- 864 46. Chakraborty, A., Mahajan, S., Jaiswal, S.K. & Sharma, V.K. Genome sequencing of  
865 turmeric provides evolutionary insights into its medicinal properties. *Commun. Biol.* **4**,  
866 1-12 (2021).
- 867 47. Droc, G. *et al.* The banana genome hub. *Database* **2013**, 1-14 (2013).
- 868 48. Rijzaani, H. *et al.* The pangenome of banana highlights differences between genera and  
869 genomes. *The Plant Genome* **15**:e20100, 1-11 (2021).
- 870 49. Luo, M.-C. *et al.* Genome sequence of the progenitor of the wheat D genome *Aegilops*  
871 *tauschii*. *Nature* **551**, 498-502 (2017).
- 872 50. Singh, R. *et al.* Oil palm genome sequence reveals divergence of interfertile species in  
873 Old and New worlds. *Nature* **500**, 335-339 (2013).
- 874 51. Schnable, P.S. *et al.* The B73 maize genome: complexity, diversity, and dynamics.  
875 *Science* **326**, 1112-1115 (2009).
- 876 52. Wei, C. *et al.* Draft genome sequence of *Camellia sinensis* var. *sinensis* provides  
877 insights into the evolution of the tea genome and tea quality. *Proc. Natl Acad. Sci.* **115**,  
878 E4151-E4158 (2018).
- 879 53. Xia, E.-H. *et al.* Tea plant genomics: achievements, challenges and perspectives. *Hort.*  
880 *Res.* **7**, (2020).

- 881 54. Jayakodi, M. *et al.* Ginseng genome database: an open-access platform for genomics of  
882 Panax ginseng. *BMC Plant Biol.* **18**, 1-7 (2018).
- 883 55. Michael, T.P. & VanBuren, R. Building near-complete plant genomes. *Curr. Opin.*  
884 *Plant Biol.* **54**, 26-33 (2020).
- 885 56. Wang, Z. *et al.* A chromosome-level reference genome of *Ensete glaucum* gives insight  
886 into diversity and chromosomal and repetitive sequence evolution in the Musaceae.  
887 *GigaScience* **11**, (2022).
- 888 57. Tan, E.C. *et al.* Proteomic analysis of cell suspension cultures of *Boesenbergia rotunda*  
889 induced by phenylalanine: identification of proteins involved in flavonoid and  
890 phenylpropanoid biosynthesis pathways. *Plant Cell, Tissue and Organ Culture*  
891 (*PCTOC*) **111**, 219-229 (2012).
- 892 58. Bennetzen, J.L. & Wang, H. The contributions of transposable elements to the structure,  
893 function, and evolution of plant genomes. *Annu. Rev. Plant Biol.* **65**, 505-530 (2014).
- 894 59. Liu, N. *et al.* Genome sequencing and population resequencing provide insights into  
895 the genetic basis of domestication and diversity of vegetable soybean. *Hort. Res.* **9**,  
896 uhab052 (2022).
- 897 60. Simão, F.A., Waterhouse, R.M., Ioannidis, P., Kriventseva, E.V. & Zdobnov, E.M.  
898 BUSCO: assessing genome assembly and annotation completeness with single-copy  
899 orthologs. *Bioinformatics* **31**, 3210-3212 (2015).
- 900 61. Emms, D.M. & Kelly, S. OrthoFinder: phylogenetic orthology inference for  
901 comparative genomics. *Genome Biol.* **20**, 1-14 (2019).
- 902 62. Emms, D. & Kelly, S. STAG: species tree inference from all genes. *BioRxiv* 267914  
903 (2018).
- 904 63. Emms, D.M. & Kelly, S. STRIDE: species tree root inference from gene duplication  
905 events. *Mol. Biol. Evol.* **34**, 3267-3278 (2017).
- 906 64. Guardo, M.D. *et al.* The haplotype-resolved reference genome of lemon (*Citrus limon*  
907 L. Burm f.). *Tree Genet. Genom.* **17**, 1-12 (2021).
- 908 65. Baek, S. *et al.* Draft genome sequence of wild *Prunus yedoensis* reveals massive inter-  
909 specific hybridization between sympatric flowering cherries. *Genome Biol.* **19**, 1-17  
910 (2018).
- 911 66. Chin, C.-S. *et al.* Phased diploid genome assembly with single-molecule real-time  
912 sequencing. *Nat. Methods* **13**, 1050-1054 (2016).
- 913 67. Chia, Y.C., Teh, S.-H. & Mohamed, Z. Isolation and characterization of Chalcone  
914 Isomerase (CHI) Gene from *Boesenbergia rotunda*. *S. Afr. J. Bot.* **130**, 475-482 (2020).
- 915 68. Liew, Y.J.M., Lee, Y.K., Khalid, N., Abd Rahman, N. & Tan, B.C. Enhancing  
916 flavonoid production by promiscuous activity of prenyltransferase, BrPT2 from  
917 *Boesenbergia rotunda*. *PeerJ* **8**, e9094 (2020).

- 918 69. Wu, W. *et al.* Whole genome sequencing of a banana wild relative *Musa itinerans*  
919 provides insights into lineage-specific diversification of the *Musa* genus. *Sci. Rep.* **6**, 1-  
920 11 (2016).
- 921 70. D'hont, A. *et al.* The banana (*Musa acuminata*) genome and the evolution of  
922 monocotyledonous plants. *Nature* **488**, 213-217 (2012).
- 923 71. Cheng, S.-P. *et al.* Haplotype-resolved genome assembly and allele-specific gene  
924 expression in cultivated ginger. *Hort. Res.* **8**, 1-15 (2021).
- 925 72. Macas, J. *et al.* In depth characterization of repetitive DNA in 23 plant genomes reveals  
926 sources of genome size variation in the legume tribe Fabaceae. *PLoS one* **10**, e0143424  
927 (2015).
- 928 73. McCann, J. *et al.* Differential genome size and repetitive DNA evolution in diploid  
929 species of *Melampodium* sect. *Melampodium* (Asteraceae). *Front. Plant Sci.* **11**, 362  
930 (2020).
- 931 74. Li, H.-L. *et al.* Haplotype-resolved genome of diploid ginger (*Zingiber officinale*) and  
932 its unique gingerol biosynthetic pathway. *Hort. Res.* **8**, 1-13 (2021).
- 933 75. Bennetzen, J.L. The structure and evolution of angiosperm nuclear genomes. *Curr.*  
934 *Opin. Plant Biol.* **1**, 103-108 (1998).
- 935 76. Alonso, C., Pérez, R., Bazaga, P. & Herrera, C.M. Global DNA cytosine methylation  
936 as an evolving trait: phylogenetic signal and correlated evolution with genome size in  
937 angiosperms. *Front. Genet.* **6**, 4 (2015).
- 938 77. Fedoroff, N.V. Transposable elements, epigenetics, and genome evolution. *Science*  
939 **338**, 758-767 (2012).
- 940 78. Rabinowicz, P.D. *et al.* Differential methylation of genes and repeats in land plants.  
941 *Genome Res.* **15**, 1431-1440 (2005).
- 942 79. Rabinowicz, P.D. *et al.* Genes and transposons are differentially methylated in plants,  
943 but not in mammals. *Genome Res.* **13**, 2658-2664 (2003).
- 944 80. Vaughn, M.W. *et al.* Epigenetic natural variation in *Arabidopsis thaliana*. *PLoS Biol.*  
945 **5**, e174 (2007).
- 946 81. Crisp, P.A. *et al.* Stable unmethylated DNA demarcates expressed genes and their cis-  
947 regulatory space in plant genomes. *Proc. Natl Acad. Sci.* **117**, 23991-24000 (2020).
- 948 82. Aya, K. *et al.* De novo transcriptome assembly of a fern, *Lygodium japonicum*, and a  
949 web resource database, Ljtrans DB. *Plant Cell Physiol.* **56**, e5-e5 (2015).
- 950 83. Karim, R., Tan, Y.S., Singh, P., Khalid, N. & Harikrishna, J.A. Expression and DNA  
951 methylation of SERK, BBM, LEC2 and WUS genes in in vitro cultures of *Boesenbergia*  
952 *rotunda* (L.) Mansf. *Physiol. Mol. Biol. Plants* **24**, 741-751 (2018a).

- 953 84. Karim, R. *et al.* Expression and DNA methylation of MET1, CMT3 and DRM2 during  
954 in vitro culture of *Boesenbergia rotunda* (L.) Mansf. *Philipp. Agric. Sci.* **101**, 261-270  
955 (2018b).
- 956 85. Biswas, M.K. *et al.* Transcriptome wide SSR discovery cross-taxa transferability and  
957 development of marker database for studying genetic diversity population structure of  
958 *Lilium* species. *Sci. Rep.* **10**, 1-13 (2020).
- 959 86. Biswas, M.K. *et al.* The landscape of microsatellites in the enset (*Ensete ventricosum*)  
960 genome and web-based marker resource development. *Sci. Rep.* **10**, 1-11 (2020).
- 961 87. Devi, K.D., Punyarani, K., Singh, N.S. & Devi, H.S. An efficient protocol for total  
962 DNA extraction from the members of order Zingiberales-suitable for diverse PCR  
963 based downstream applications. *SpringerPlus* **2**, 669 (2013).
- 964 88. Xie, M. *et al.* A reference-grade wild soybean genome. *Nat. Commun.* **10**, 1-12 (2019).
- 965 89. Kiefer, E., Heller, W. & Ernst, D. A simple and efficient protocol for isolation of  
966 functional RNA from plant tissues rich in secondary metabolites. *Plant Mol. Biol. Rep.*  
967 **18**, 33-39 (2000).
- 968 90. Schwarzacher, T. & Heslop-Harrison, P. Practical in situ hybridization (BIOS Scientific  
969 Publishers Ltd., 2000).
- 970 91. Gerlach, W. & Bedbrook, J. Cloning and characterization of ribosomal RNA genes  
971 from wheat and barley. *Nucleic Acids Res.* **7**, 1869-1885 (1979).
- 972 92. Yan, L. *et al.* The genome of *Dendrobium officinale* illuminates the biology of the  
973 important traditional Chinese orchid herb. *Mol. Plant* **8**, 922-934 (2015).
- 974 93. Lin, E. *et al.* Genome survey of Chinese fir (*Cunninghamia lanceolata*): Identification  
975 of genomic SSRs and demonstration of their utility in genetic diversity analysis. *Sci.*  
976 *Rep.* **10**, 1-12 (2020).
- 977 94. Marçais, G. & Kingsford, C. A fast, lock-free approach for efficient parallel counting  
978 of occurrences of k-mers. *Bioinformatics* **27**, 764-770 (2011).
- 979 95. Ranallo-Benavidez, T.R., Jaron, K.S. & Schatz, M.C. GenomeScope 2.0 and  
980 Smudgeplot for reference-free profiling of polyploid genomes. *Nat. Commun.* **11**, 1-10  
981 (2020).
- 982 96. Pendleton, M. *et al.* Assembly and diploid architecture of an individual human genome  
983 via single-molecule technologies. *Nat. Methods* **12**, 780 (2015).
- 984 97. Chin, C.-S. *et al.* Nonhybrid, finished microbial genome assemblies from long-read  
985 SMRT sequencing data. *Nat. Methods* **10**, 563 (2013).
- 986 98. Liu, H., Wu, S., Li, A. & Ruan, J. SMARTdenovo: A de novo assembler using long  
987 noisy reads. *Gigabyte* **2021**, 1-9 (2021).
- 988 99. Walker, B.J. *et al.* Pilon: an integrated tool for comprehensive microbial variant  
989 detection and genome assembly improvement. *PloS one* **9**, e112963 (2014).

- 990 100. Boetzer, M., Henkel, C.V., Jansen, H.J., Butler, D. & Pirovano, W. Scaffolding pre-  
991 assembled contigs using SSPACE. *Bioinformatics* **27**, 578-579 (2011).
- 992 101. English, A.C. *et al.* Mind the gap: upgrading genomes with Pacific Biosciences RS  
993 long-read sequencing technology. *PloS one* **7**, e47768 (2012).
- 994 102. Li, H. Aligning sequence reads, clone sequences and assembly contigs with BWA-  
995 MEM. *arXiv:1303.3997* (Preprint) **0**, 1-3 (2013).
- 996 103. Benson, G. Tandem repeats finder: a program to analyze DNA sequences. *Nucleic  
997 Acids Res.* **27**, 573-580 (1999).
- 998 104. Bao, W., Kojima, K.K. & Kohany, O. Repbase Update, a database of repetitive  
999 elements in eukaryotic genomes. *Mob. DNA* **6**, 11 (2015).
- 1000 105. Kim, D., Paggi, J.M., Park, C., Bennett, C. & Salzberg, S.L. Graph-based genome  
1001 alignment and genotyping with HISAT2 and HISAT-genotype. *Nat. Biotechnol.* **37**,  
1002 907-915 (2019).
- 1003 106. Stanke, M. *et al.* AUGUSTUS: ab initio prediction of alternative transcripts. *Nucleic  
1004 Acids Res.* **34**, W435-W439 (2006).
- 1005 107. Stanke, M., Diekhans, M., Baertsch, R. & Haussler, D. Using native and syntenically  
1006 mapped cDNA alignments to improve de novo gene finding. *Bioinformatics* **24**, 637-  
1007 644 (2008).
- 1008 108. Burge, C. & Karlin, S. Prediction of complete gene structures in human genomic DNA.  
1009 *J. Mol. Biol.* **268**, 78-94 (1997).
- 1010 109. Korf, I. Gene finding in novel genomes. *BMC Bioinformatics* **5**, 59 (2004).
- 1011 110. Chappell, J. & Hahlbrock, K. Transcription of plant defence genes in response to UV  
1012 light or fungal elicitor. *Nature* **311**, 76 (1984).
- 1013 111. Deng, Y. *et al.* Integrated nr database in protein annotation system and its localization.  
1014 *Comput. Eng.* **32**, 71-74 (2006).
- 1015 112. Jones, P. *et al.* InterProScan 5: genome-scale protein function classification.  
1016 *Bioinformatics* **30**, 1236-1240 (2014).
- 1017 113. Ashburner, M. *et al.* Gene ontology: tool for the unification of biology. *Nat. Genet.* **25**,  
1018 25-29 (2000).
- 1019 114. Kanehisa, M. & Goto, S. KEGG: kyoto encyclopedia of genes and genomes. *Nucleic  
1020 Acids Res.* **28**, 27-30 (2000).
- 1021 115. Bairoch, A. & Apweiler, R. The SWISS-PROT protein sequence database and its  
1022 supplement TrEMBL in 2000. *Nucleic Acids Res.* **28**, 45-48 (2000).
- 1023 116. Tatusov, R.L. *et al.* The COG database: an updated version includes eukaryotes. *BMC  
1024 Bioinformatics* **4**, 41 (2003).

- 1025 117. Lowe, T.M. & Eddy, S.R. tRNAscan-SE: a program for improved detection of transfer  
1026 RNA genes in genomic sequence. *Nucleic Acids Res.* **25**, 955-964 (1997).
- 1027 118. Kalvari, I. *et al.* Rfam 13.0: shifting to a genome-centric resource for non-coding RNA  
1028 families. *Nucleic Acids Res.* **46**, D335-D342 (2018).
- 1029 119. Nawrocki, E.P. & Eddy, S.R. Infernal 1.1: 100-fold faster RNA homology searches.  
1030 *Bioinformatics* **29**, 2933-2935 (2013).
- 1031 120. Kumar, S., Stecher, G., Li, M., Knyaz, C. & Tamura, K. MEGA X: molecular  
1032 evolutionary genetics analysis across computing platforms. *Mol. Biol. Evol.* **35**, 1547-  
1033 1549 (2018).
- 1034 121. Conway, J.R., Lex, A. & Gehlenborg, N. UpSetR: an R package for the visualization  
1035 of intersecting sets and their properties. *Bioinformatics* **33**, 2938-2940 (2017).
- 1036 122. Mendes, F.K., Vanderpool, D., Fulton, B. & Hahn, M.W. CAFE 5 models variation in  
1037 evolutionary rates among gene families. *Bioinformatics* **36**, 5516-5518 (2021).
- 1038 123. Britton, T., Anderson, C.L., Jacquet, D., Lundqvist, S. & Bremer, K. Estimating  
1039 divergence times in large phylogenetic trees. *Syst. Biol.* **56**, 741-752 (2007).
- 1040 124. Jeremy, S. *et al.* Genome sequencing and analysis of the model grass *Brachypodium*  
1041 *distachyon*. *Nature* **463**, (2010).
- 1042 125. Vandepoele, K., Saeys, Y., Simillion, C., Raes, J. & Van de Peer, Y. The automatic  
1043 detection of homologous regions (ADHoRe) and its application to microcolinearity  
1044 between *Arabidopsis* and rice. *Genome Res.* **12**, 1792-1801 (2002).
- 1045 126. Krueger, F. Trim galore. *A wrapper tool around Cutadapt and FastQC to consistently*  
1046 *apply quality and adapter trimming to FastQ files* **516**,  
1047 [https://www.bioinformatics.babraham.ac.uk/projects/trim\\_galore/](https://www.bioinformatics.babraham.ac.uk/projects/trim_galore/) (2015).
- 1048 127. Krueger, F. & Andrews, S.R. Bismark: a flexible aligner and methylation caller for  
1049 Bisulfite-Seq applications. *Bioinformatics* **27**, 1571-1572 (2011).
- 1050 128. Song, Q. *et al.* A reference methylome database and analysis pipeline to facilitate  
1051 integrative and comparative epigenomics. *PloS one* **8**, e81148 (2013).
- 1052 129. Schulz, M.H., Zerbino, D.R., Vingron, M. & Birney, E. Oases: robust de novo RNA-  
1053 seq assembly across the dynamic range of expression levels. *Bioinformatics* **28**, 1086-  
1054 1092 (2012).
- 1055 130. Simpson, J.T. *et al.* ABySS: a parallel assembler for short read sequence data. *Genome*  
1056 *Res.* **19**, 1117-1123 (2009).
- 1057 131. Xie, Y. *et al.* SOAPdenovo-Trans: de novo transcriptome assembly with short RNA-  
1058 Seq reads. *Bioinformatics* **30**, 1660-1666 (2014).
- 1059 132. Henschel, R. *et al.* Trinity RNA-Seq assembler performance optimization. in *XSEDE*  
1060 *'12 Proceedings of the 1st Conference of the Extreme Science and Engineering*

- 1061            *Discovery Environment: bridging from the eXtreme to the campus and beyond* 45  
1062            (ACM, Chicago, Illinois, USA, 2012).
- 1063    133.    Li, W. & Godzik, A. Cd-hit: a fast program for clustering and comparing large sets of  
1064            protein or nucleotide sequences. *Bioinformatics* **22**, 1658-1659 (2006).
- 1065    134.    Pertea, G. *et al.* TIGR Gene Indices clustering tools (TGICL): a software system for  
1066            fast clustering of large EST datasets. *Bioinformatics* **19**, 651-652 (2003).
- 1067    135.    Conesa, A. *et al.* Blast2GO: a universal tool for annotation, visualization and analysis  
1068            in functional genomics research. *Bioinformatics* **21**, 3674-3676 (2005).
- 1069    136.    Götz, S. *et al.* High-throughput functional annotation and data mining with the  
1070            Blast2GO suite. *Nucleic Acids Res.* **36**, 3420-3435 (2008).
- 1071    137.    Kanehisa, M. The KEGG database in ‘In silico’ simulation of biological processes Vol.  
1072            247 (eds Bock, G. & Goode, J.A.) 91-100 (John Wiley & Sons Ltd., 2002).
- 1073    138.    Li, B. & Dewey, C.N. RSEM: accurate transcript quantification from RNA-Seq data  
1074            with or without a reference genome. *BMC Bioinformatics* **12**, 323 (2011).
- 1075    139.    Robinson, M.D., McCarthy, D.J. & Smyth, G.K. edgeR: a Bioconductor package for  
1076            differential expression analysis of digital gene expression data. *Bioinformatics* **26**, 139-  
1077            140 (2010).
- 1078    140.    Biswas, M. *et al.* Exploration and exploitation of novel SSR markers for candidate  
1079            transcription factor genes in *Lilium* species. *Genes* **9**, 97 (2018).
- 1080    141.    Untergasser, A. *et al.* Primer3—new capabilities and interfaces. *Nucleic Acids Res.* **40**,  
1081            e115-e115 (2012).
- 1082    142.    Schuler, G.D. Sequence mapping by electronic PCR. *Genome Res.* **7**, 541-550 (1997).
- 1083
- 1084
- 1085
- 1086
- 1087
- 1088
- 1089
- 1090
- 1091
- 1092



1093 **Figure legends**

1094

1095 **Figure 1.** Number and location of 45S and 5S rDNA sites on metaphase chromosomes of  
1096 *Boesenbergia rotunda* ( $2n=36$ ). Fluorescent *in situ* hybridization with clone pTa71 (45S rDNA  
1097 of wheat), labelled with digoxigenin and detected with FITC (green) and clone pTa794 (5S  
1098 rDNA of wheat) labelled with biotin and detected with Alexa 674 (shown in red). A-C: early  
1099 metaphase showing 6 sites of 45S rDNA (arrows) of variable strength at ends of 3 pairs of  
1100 chromosomes. In some cases, the rDNA is extended, and the satellite is separated from the  
1101 main chromosomes shown enlarged in B and C. D: Two 5S rDNA sites (arrows) were detected  
1102 on a chromosome pair not bearing 45S rDNA. The star indicates fusion of 2 or 3 45S rDNA  
1103 sites. E and F: Chromosome preparation using fresh root tips from plants grown and analysed  
1104 in two different laboratories (E: University of Malaya and F: University of Leicester) showing  
1105 36 chromosomes.

1106

1107 **Figure 2.** (a-b) Frequency distribution of SSR motif; (c) transferability of genomic and  
1108 transcript SSR markers in four relatives of *B. rotunda*.

1109

1110 **Figure 3.** (a), Gene ontology (GO) classification of assembled unigenes of *B. rotunda*. Results  
1111 are summarized in three main categories: biological process (BP), molecular function (MF),  
1112 and cellular component (CC). The x-axis indicates the subgroups in GO annotation while the  
1113 y-axis indicates the percentage of specific categories of genes in each main category; (b),  
1114 Distribution of Eukaryotic Orthologous Groups (KOG) classification. A total of 18,767  
1115 assembled unigenes were annotated and assigned to 25 functional categories. The vertical axis  
1116 indicates subgroups in the KOG classification and the x-axis represents the number of genes in  
1117 each main category.

1118

1119 **Figure 4.** (a) Cross-genera phylogenetic analysis of *B. rotunda* and 13 other species; (b) UpSet  
1120 plot showing unique and shared protein ortholog clusters of *B. rotunda* and 13 selected  
1121 reference genomes. Connected dots represent the intersections of overlapping orthologs with  
1122 the vertical black bars above showing the number of orthogroups in each intersection.

1123

1124 **Figure 5.** Scheme of the flavonoid and phenylpropanoid biosynthetic pathways in *B. rotunda*  
1125 based on KEGG pathways. Genes encoding enzymes for each step are indicated as follows:  
1126 CAD, cinnamyl alcohol dehydrogenase; and BGLU, Beta-glucosidase; CALDH, coniferyl-  
1127 aldehyde dehydrogenase; C4H, cinnamic acid 4-hydroxylase; 4CL, 4-coumarate-CoA ligase;  
1128 CHS, chalcone synthase; CHI, chalcone isomerase; CCoAOMT, caffeoyl-CoA 3-O-  
1129 methyltransferase; C3H,  $\rho$ -coumarate 3-hydroxylase; CCR, cinnamoyl-CoA reductase;  
1130 COMT, caffeic acid O-methyltransferase; 6'DCHS, 6'-deoxychalcone synthase; DFR,  
1131 dihydroflavonol 4-reductase; F3H, flavonoid 3-hydroxylase; F5H, ferulate 5-hydroxylase,  
1132 HCT, Hydroxycinnamoyl-CoA shikimate; LPO, Lactoperoxidase; PAL, phenylalanine  
1133 ammonia lyase. Beside each enzyme, four boxes shown (from left to right): *In vitro* leaf (IVL),  
1134 Embryogenic callus (EC), Dry callus (DC), Watery callus (WC). Red boxes indicate relatively  
1135 higher mRNA expression compared to the leaf sample with the highest levels in darker red.  
1136 Green boxes indicate relatively lower expression compared to the leaf sample. The colour box  
1137 is based on  $\log_2FC$  values.

1138

1139 **Figure 6.** (a-d) Average methylation levels of DNA methyltransferase-related genes (MET1,  
1140 CMT3, DRM2), somatic embryogenesis genes (SERK, BBM, LEC2, and WUS), and genes

1141 involved in flavonoid and phenylpropanoid biosynthesis pathways in different samples of *B.*  
1142 *rotunda*; *ex-vitro* leaf (EVL), *in vitro* leaf (IVL), Embryogenic callus (EC), Dry callus (DC),  
1143 Watery callus (WC). a) cytosine methylation; b) CpG methylation; c) CHG methylation; and  
1144 d) for CHH methylation. CAD, cinnamyl alcohol dehydrogenase; and BGLU, Beta-  
1145 glucosidase; CALDH, coniferyl-aldehyde dehydrogenase; C4H, cinnamic acid 4-hydroxylase;  
1146 4CL, 4-coumarate-CoA ligase; CHS, chalcone synthase; CHI, chalcone isomerase;  
1147 CCoAOMT, caffeoyl-CoA 3-O-methyltransferase; C3H,  $\rho$ -coumarate 3-hydroxylase; CCR,  
1148 cinnamoyl-CoA reductase; COMT, caffeic acid O-methyltransferase; 6'DCHS, 6'-  
1149 deoxychalcone synthase; DFR, dihydroflavonol 4-reductase; F3H, flavonoid 3-hydroxylase;  
1150 F5H, ferulate 5-hydroxylase, HCT, Hydroxycinnamoyl-CoA shikimate; LPO,  
1151 Lactoperoxidase; PAL, phenylalanine ammonia lyase; WOX, Wuschel; LEC3, Leafy  
1152 cotyledon 2; BBM, Baby boom; SERK, Somatic embryogenesis receptor-like kinase; MET1,  
1153 Methyltransferase 1; CMT3, Chromomethylase 3; DRM2, Domain rearranged  
1154 methyltransferase 2.

1155

1156 **Figure 7.** Expression level and total methylation level in all cytosine contexts of methylation-  
1157 related genes (a & b), somatic embryogenesis-related gene (c & d) and flavonoid and  
1158 phenylpropanoid biosynthesis pathways-related genes (e & f) in *ex vitro* leaf (EVL), *in vitro*  
1159 leaf (IVL), embryogenic callus (EC), dry callus (DC), and watery callus (WC). CAD, cinnamyl  
1160 alcohol dehydrogenase; and BGLU, Beta-glucosidase; CALDH, coniferyl-aldehyde  
1161 dehydrogenase; C4H, cinnamic acid 4-hydroxylase; 4CL, 4-coumarate-CoA ligase; CHS,  
1162 chalcone synthase; CHI, chalcone isomerase; CCoAOMT, caffeoyl-CoA 3-O-  
1163 methyltransferase; C3H,  $\rho$ -coumarate 3-hydroxylase; CCR, cinnamoyl-CoA reductase;  
1164 COMT, caffeic acid O-methyltransferase; 6'DCHS, 6'-deoxychalcone synthase; DFR,  
1165 dihydroflavonol 4-reductase; F3H, flavonoid 3-hydroxylase; F5H, ferulate 5-hydroxylase,  
1166 HCT, Hydroxycinnamoyl-CoA shikimate; LPO, Lactoperoxidase; PAL, phenylalanine  
1167 ammonia lyase.

1168

1169

1170

1171

1172

1173

1174

1175

1176

1177

1178

1179

1180

1181

1182

1183

1184

1185

1186

1187

1188

**Table 1:** Statistics of the final genome assembly of the *B. rotunda*

|                | No.    | Scaffolds     |               | Contigs |               |            |
|----------------|--------|---------------|---------------|---------|---------------|------------|
|                |        | Size (bp)     |               | No.     | Size (bp)     | Gaps       |
|                |        | With gaps     | Without gaps  |         |               |            |
| Total Number   | 10,627 |               |               | 27,491  |               | 16,864     |
| Min            | -      | 5,830         | 5,830         | -       | 5,198         | 25         |
| Median         | -      | 136,187       | 131,005       | -       | 55,047        | 2,415      |
| Mean           | -      | 220,901       | 213,350       | -       | 82,473        | 4,758      |
| Max            | -      | 2,848,924     | 2,758,809     | -       | 1,033,476     | 38,914     |
| Total size     | -      | 2,347,517,452 | 2,267,274,222 | -       | 2,267,274,222 | 80,243,230 |
| N50            | -      | 394,682       | 379,106       | -       | 123,867       | 11,038     |
| N90            | -      | 107,821       | 103,307       | -       | 37,045        | 2,551      |
| N95            | -      | 69,101        | 66,089        | -       | 27,170        | 1,540      |
| GC content (%) | 40.1   |               |               |         |               |            |

1189

1190

1191

1192

1193 Table 2. Evaluation of completeness of the final assembly

1194

| Species                     | Read Length(bp) | Data     | Sequence Depth (X) | Mapped (%) | properly paired (%) | singletons (%) | Reference total length (Gb) | Reads covered length (Gb) | Coverage (%) |
|-----------------------------|-----------------|----------|--------------------|------------|---------------------|----------------|-----------------------------|---------------------------|--------------|
| <i>Boesenbergia rotunda</i> | 250_250         | 260 (Gb) | 104                | 95.24      | 84.47               | 0.20           | 2.35                        | 2.25                      | 96           |

1195

1196

1197

1198

1199

1200

1201

1202

1203

1204

1205

1206

1207

1208

1209

1210

1211

1212

1213

1214

1215

1216

1217

Table 3. Comparison of *de novo* transcriptome assembly results for four different assembly software: SOAP-*denovo*, Oases, TransAbyss, and Trinity.

| Features                                                                                           | SOAP- <i>denovo</i><br>(K25) | Oases<br>(K21) | TransAbyss<br>(K25) | Trinity<br>(K25) |
|----------------------------------------------------------------------------------------------------|------------------------------|----------------|---------------------|------------------|
| N50 size (bp)                                                                                      | 410                          | 1,019          | 495                 | 487              |
| N50 No.                                                                                            | 22,910                       | 14,286         | 28,234              | 36,730           |
| Contig number                                                                                      | 78,492                       | 72,085         | 111,327             | 158,465          |
| Transcript's size (bp)                                                                             | 30,869,274                   | 51,258,323     | 50,358,442          | 70,949,809       |
| Average transcript length<br>(bp)                                                                  | 393                          | 711            | 452                 | 448              |
| Min contig length(bp)                                                                              | 200                          | 200            | 200                 | 200              |
| Max Contig length (bp)                                                                             | 15,760                       | 12,523         | 33,886              | 13,325           |
| Assessment assembly after merged assembly of non-redundant contigs from different k-mers via TGICL |                              |                |                     |                  |
| N50 size (bp)                                                                                      | 572                          | 1013           | 607                 | 536              |
| N50 no.                                                                                            | 18,528                       | 17,329         | 28,419              | 26,034           |
| Contig number                                                                                      | 78,963                       | 95,847         | 132,572             | 115,096          |
| Transcriptome size (bp)                                                                            | 38,503,434                   | 66,535,881     | 67,286,353          | 54,131,258       |
| Average length (bp)                                                                                | 488                          | 694            | 508                 | 470              |
| Min contig length(bp)                                                                              | 200                          | 200            | 200                 | 200              |
| Max Contig length (bp)                                                                             | 43,900                       | 88,053         | 100,968             | 19,761           |

1218  
1219  
1220  
1221  
1222  
1223  
1224  
1225  
1226  
1227  
1228  
1229  
1230  
1231  
1232  
1233  
1234  
1235  
1236  
1237  
1238  
1239

1240  
1241

Table 4. TEs Content in the assembled *B. rotunda* genome

| Type                               |               | Repeat Size (bp)     | % of genome  |
|------------------------------------|---------------|----------------------|--------------|
| <b>TRF</b>                         |               | <b>162,927,183</b>   | <b>6.94</b>  |
| RepeatMasker<br>(RepBase TEs)      | DNA           | 23,107,771           | 0.98         |
|                                    | LINE          | 7,269,664            | 0.31         |
|                                    | LTR           | 308,993,979          | 13.16        |
|                                    | SINE          | 50,226               | 0.00         |
|                                    | Other         | 1305                 | 0.00         |
|                                    | Unknown       | 0.00                 | 0.00         |
| <b>Total</b>                       |               | <b>339,001,341</b>   | <b>14.44</b> |
| RepeatProteinMask<br>(TE proteins) | DNA           | 30,071,545           | 1.28         |
|                                    | LINE          | 15,711,684           | 0.67         |
|                                    | LTR           | 449,069,450          | 19.13        |
|                                    | SINE          | 0.00                 | 0            |
|                                    | Other         | 0.00                 | 0            |
|                                    | Unknown       | 0.00                 | 0            |
| <b>Total</b>                       |               | <b>494,297,946</b>   | <b>21.05</b> |
| <i>De novo</i>                     | DNA           | 49,253,612           | 2.10         |
|                                    | LINE          | 9,765,795            | 0.42         |
|                                    | LTR           | 1,524,782,230        | 64.95        |
|                                    | SINE          | 789,305              | 0.03         |
|                                    | Other         | 0                    | 0.00         |
|                                    | Satellite     | 8,247,215            | 0.351316     |
|                                    | Simple_repeat | 6,742,687            | 0.287226     |
|                                    | Unknown       | 2,202,787            | 0.09         |
| <b>Total</b>                       |               | <b>1,591,591,610</b> | <b>67.80</b> |
| Combined TEs                       | DNA           | 77,273,965           | 3.29         |
|                                    | LINE          | 23,221,220           | 0.99         |
|                                    | LTR           | 1,576,612,191        | 67.16        |
|                                    | SINE          | 832,585              | 0.04         |
|                                    | Other         | 1,305                | 0.00         |
|                                    | Unknown       | 2,202,787            | 0.09         |
| <b>Total</b>                       |               | <b>1,653,717,174</b> | <b>70.45</b> |
| <b>Total</b>                       |               | <b>1,702,210,889</b> | <b>72.51</b> |

1242  
1243  
1244  
1245  
1246  
1247  
1248  
1249  
1250  
1251  
1252  
1253  
1254  
1255  
1256  
1257  
1258  
1259  
1260

Table 5. Genome and transcriptome-wide microsatellite identification and characterization in *B. rotunda*

| Item                                                    | Genome-wide | %     | Transcriptome-wide | %     |
|---------------------------------------------------------|-------------|-------|--------------------|-------|
| Total number of sequences examined                      | 10627       |       | 95847              |       |
| Total size of examined sequences (bp)                   | 2347517452  |       | 66535881           |       |
| Total number of identified microsatellites              | 238441      |       | 4579               |       |
| Number of microsatellites containing sequences          | 10381       |       | 4032               |       |
| Sequences contain more than 1 microsatellites           | 9803        |       | 384                |       |
| Microsatellites in compound formation                   | 4309        |       | 27                 |       |
| Microsatellite's density (1 Microsatellites per ** bp)  | 9845        |       | 14530              |       |
| Microsatellite's density (per Mbp)                      | 102         |       | 69                 |       |
| Class I microsatellites                                 | 82414       | 35.20 | 949                | 20.85 |
| Class II microsatellites                                | 151718      | 64.80 | 3603               | 79.15 |
| AT rich microsatellites                                 | 176052      | 75.19 | 2778               | 61.03 |
| GC rich microsatellites                                 | 43155       | 18.43 | 1275               | 28.01 |
| AT/GC balance microsatellites                           | 14925       | 6.37  | 499                | 10.96 |
| Mono-nucleotide repeats                                 | 68961       | 28.92 | 1137               | 24.83 |
| Di-nucleotide repeats                                   | 61439       | 25.77 | 574                | 12.54 |
| Tri-nucleotide repeats                                  | 84932       | 35.62 | 2366               | 51.67 |
| Tetra-nucleotide repeats                                | 5330        | 2.24  | 148                | 3.23  |
| Penta-nucleotide repeats                                | 9917        | 4.16  | 185                | 4.04  |
| Hexa-nucleotide repeats                                 | 7862        | 3.30  | 169                | 3.69  |
| Primer modelling was successful                         | 223678      | 93.81 | 3348               | 73.12 |
| Primer modelling failed                                 | 14763       | 6.60  | 1231               | 36.77 |
| Non redundant primer                                    | 132792      | 59.37 | 1888               | 56.39 |
| No of Primer Mapped on <i>Musa acuminata</i> genome     | 100         | 0.075 | 30                 | 1.59  |
| No of Primer Mapped on <i>Musa balbisiana</i> genome    | 105         | 0.079 | 25                 | 1.32  |
| No of Primer Mapped on <i>Musa Itinerans</i> genome     | 102         | 0.077 | 32                 | 1.69  |
| No of Primer Mapped on <i>Ensete ventricosum</i> genome | 121         | 0.091 | 27                 | 1.43  |
| No of primer tested                                     | 6           | 100   | 8                  | 100   |
| No of primer amplified                                  | 6           | 100   | 8                  | 100   |

1261

1262

1263

1264

1265

1266

1267

1268

1269

1270

1271

1272

1273

1274

1275

1276

Table 6. Statistics of function annotation

| Database        | Number | Percent (%) |
|-----------------|--------|-------------|
| NR              | 71,072 | 97.22       |
| InterPro        | 69,525 | 95.11       |
| GO              | 45,256 | 61.91       |
| KEGG            | 59,649 | 81.60       |
| Swissprot       | 57,622 | 78.82       |
| COG             | 24,851 | 33.99       |
| TrEMBL          | 70,990 | 97.11       |
| Total annotated | 73,102 | 97.81       |
| Unannotated     | 1,602  | 2.19        |

1277

1278

Table 7. Non-coding RNA genes in the genome of *B. rotunda*

| Type     | Copy  | Average length (bp) | Total length (bp) | % of genome |
|----------|-------|---------------------|-------------------|-------------|
| miRNA    | 213   | 119                 | 25,384            | 0.001081    |
| tRNA     | 2,727 | 75                  | 205,538           | 0.008756    |
| rRNA     | 486   | 232                 | 112,876           | 0.004808    |
| 18S      | 105   | 666                 | 69,922            | 0.002979    |
| 28S      | 147   | 119                 | 17,441            | 0.000743    |
| 5.8S     | 40    | 148                 | 5,931             | 0.000253    |
| 5S       | 194   | 101                 | 19,582            | 0.000834    |
| snRNA    | 2,136 | 154                 | 329,909           | 0.014054    |
| CD-box   | 600   | 105                 | 62,771            | 0.002674    |
| HACA-box | 53    | 134                 | 7,091             | 0.000302    |
| splicing | 1,483 | 175                 | 260,047           | 0.011078    |

1279

1280

1281

1282

1283

1284

1285

1286

1287

1288

1289

1290

1291

1292

1293

1294

1295

1296

1297

1298

1299

1300

1301 Figure 1.

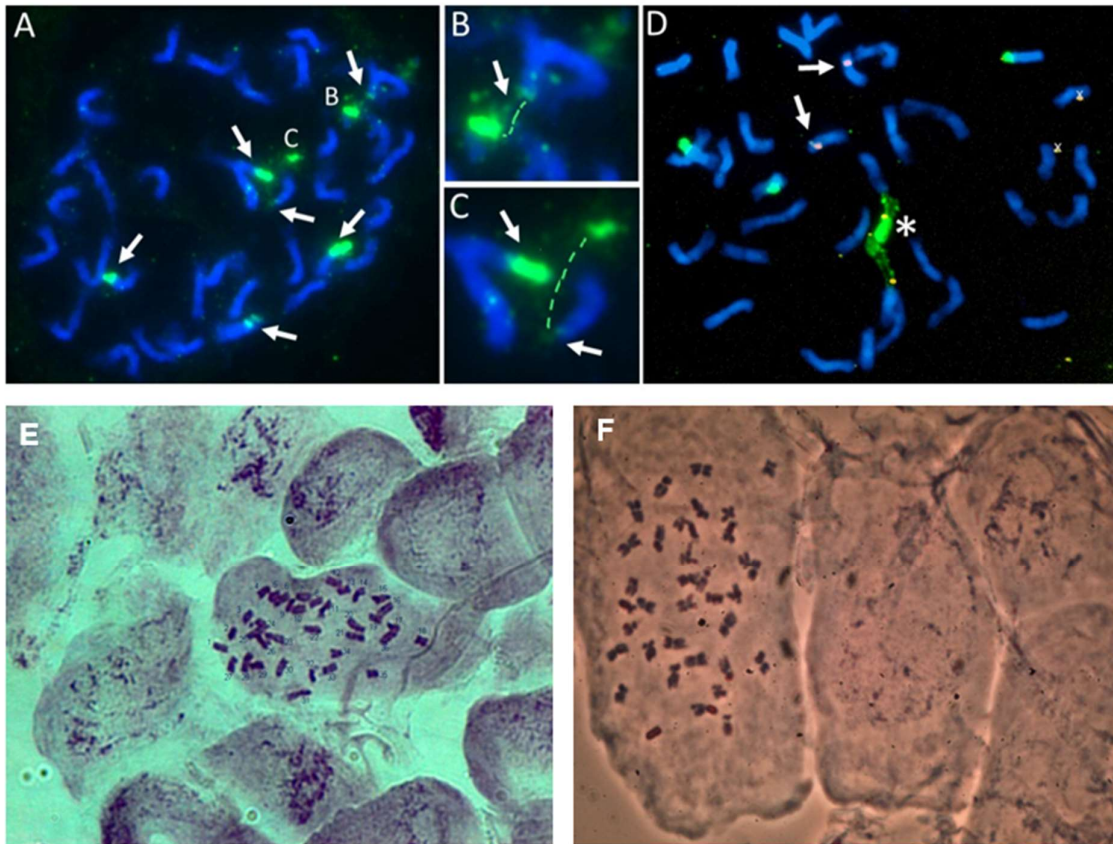

1302  
1303  
1304  
1305  
1306  
1307  
1308  
1309  
1310  
1311  
1312  
1313  
1314  
1315  
1316  
1317  
1318  
1319  
1320  
1321  
1322  
1323  
1324



1325 Figure 2.

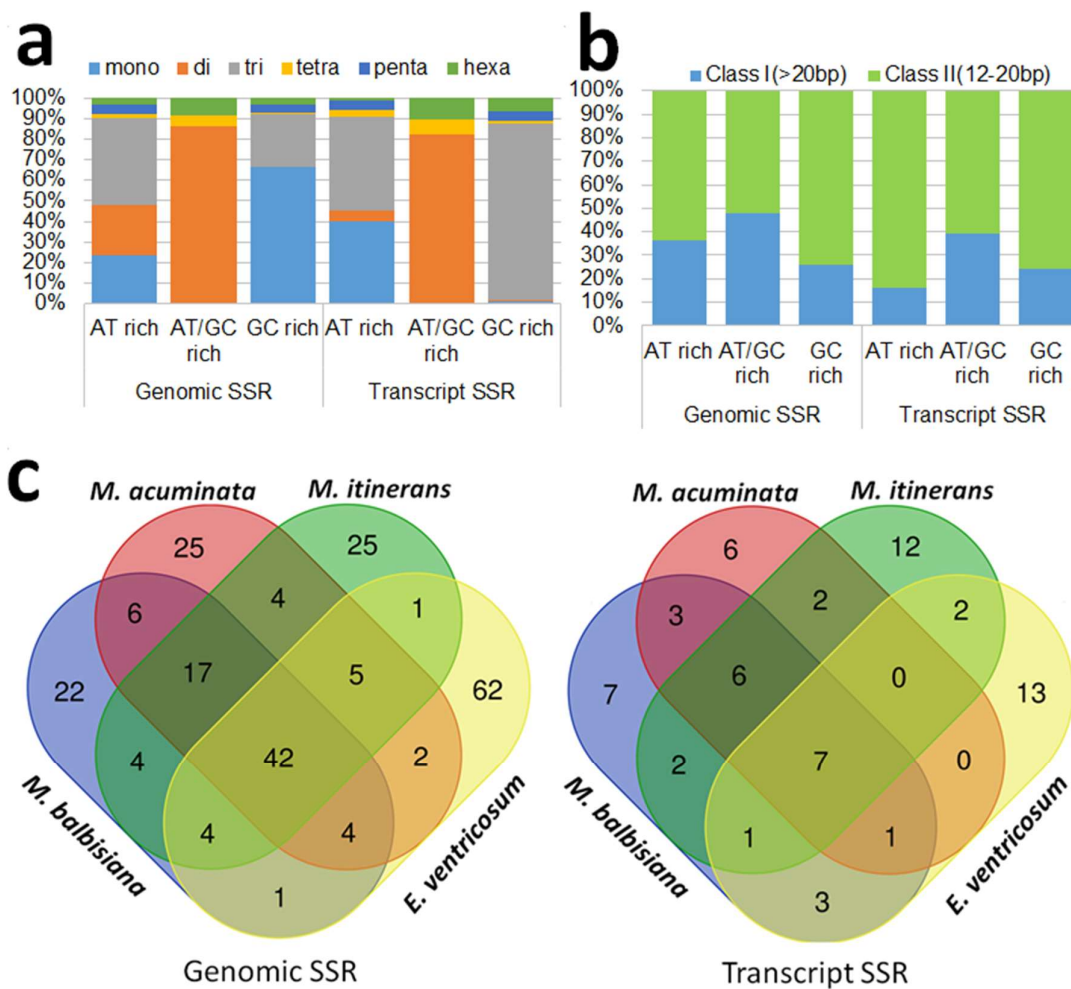

1326

1327

1328

1329

1330

1331

1332

1333

1334

1335

1336

1337

1338

1339

1340

1341

1342

1343

1344

1345 Figure 3.

1346

1347

**a**

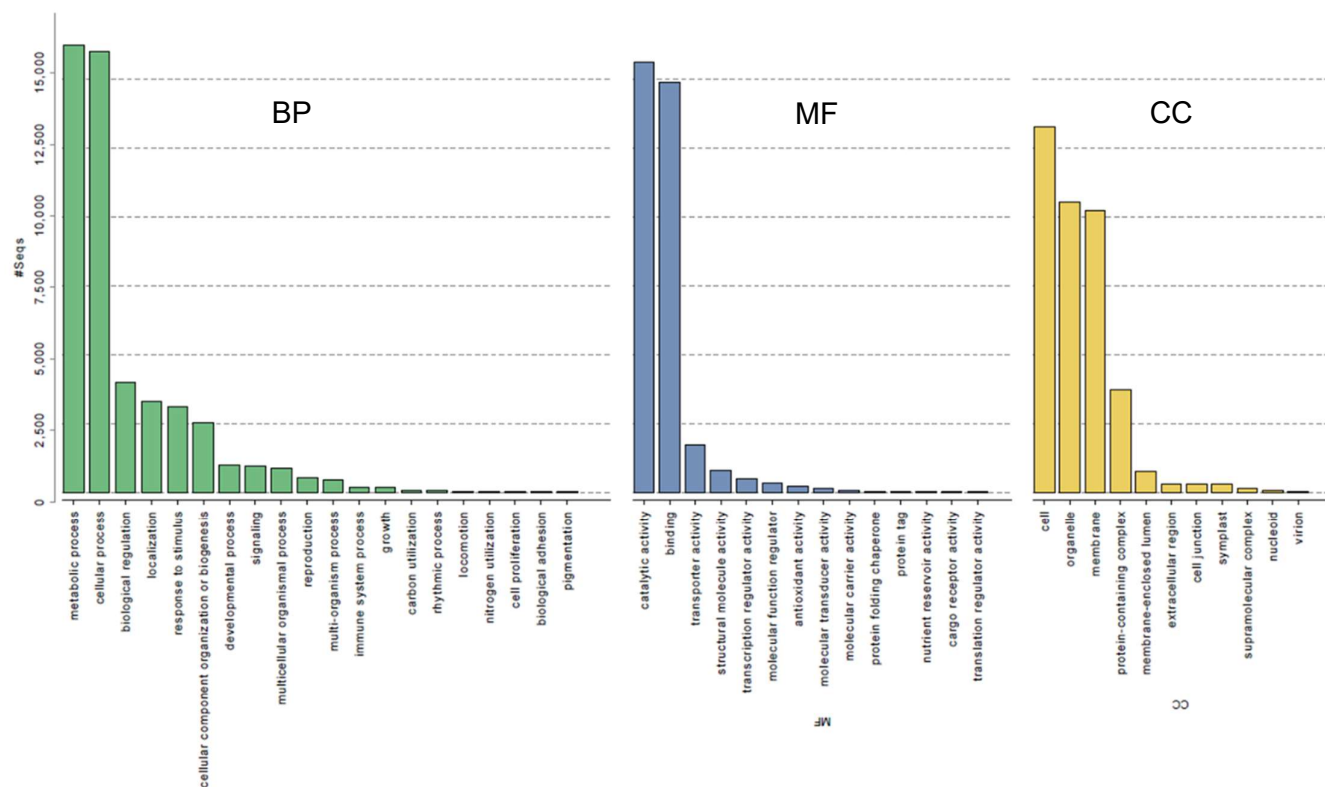

1348

1349

1350

1351

1352

1353

1354

1355

1356

1357

1358

1359

1360

1361

1362

1363

1364

1365

1366

1367

1368

**b**

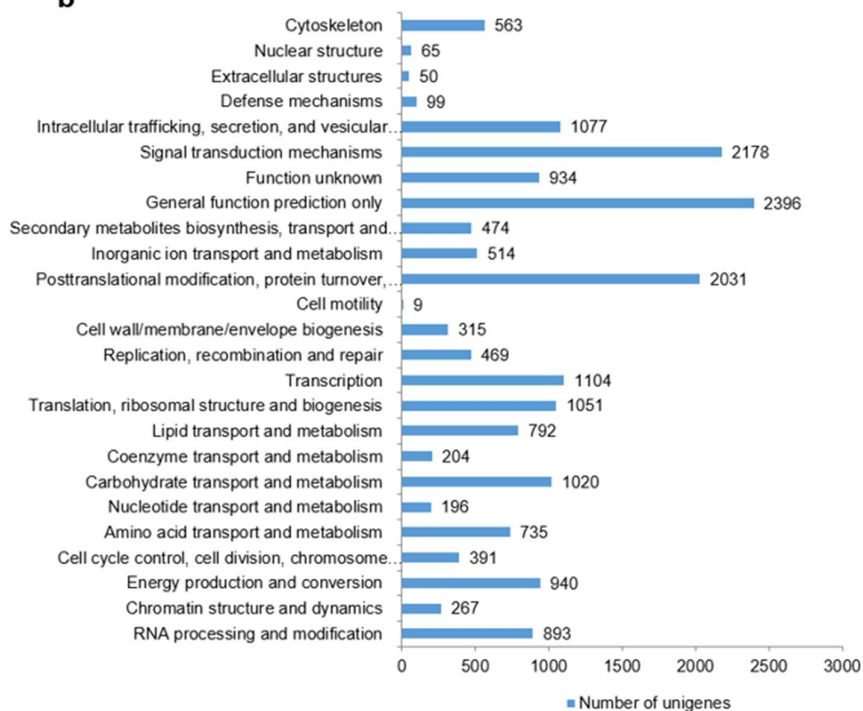

1369  
1370

Figure 4

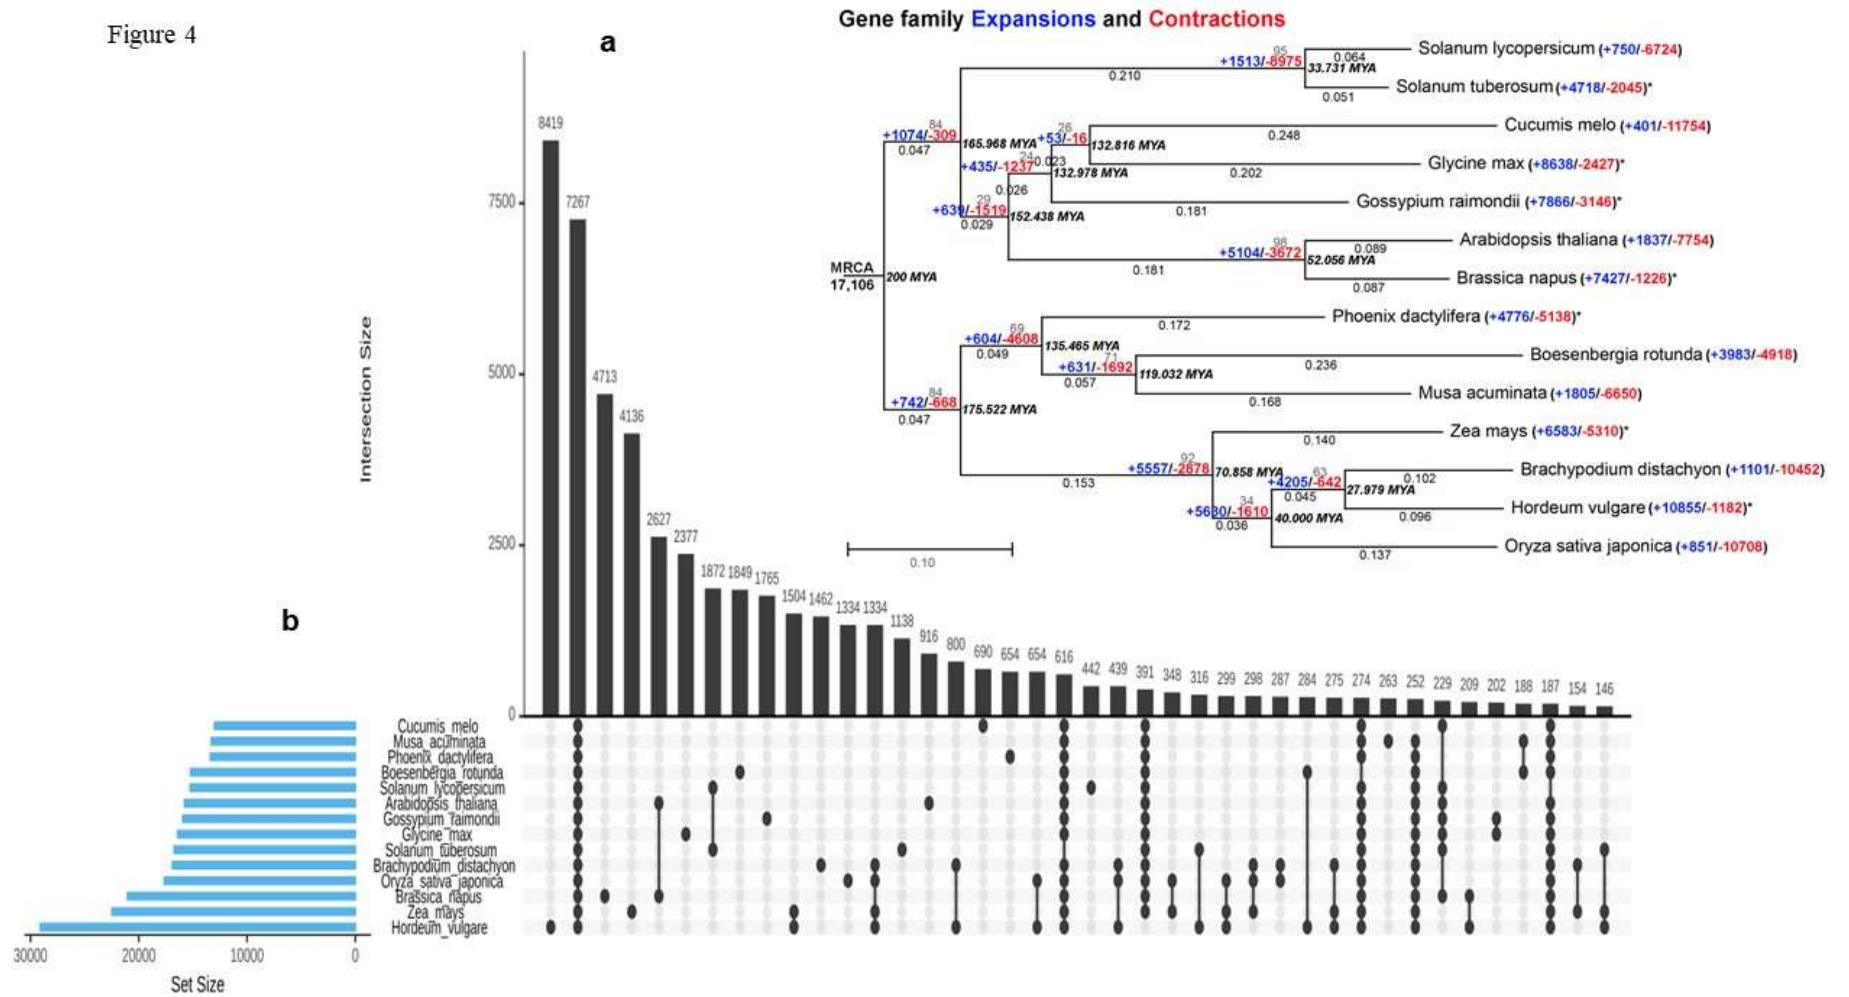

1371 Figure 5.

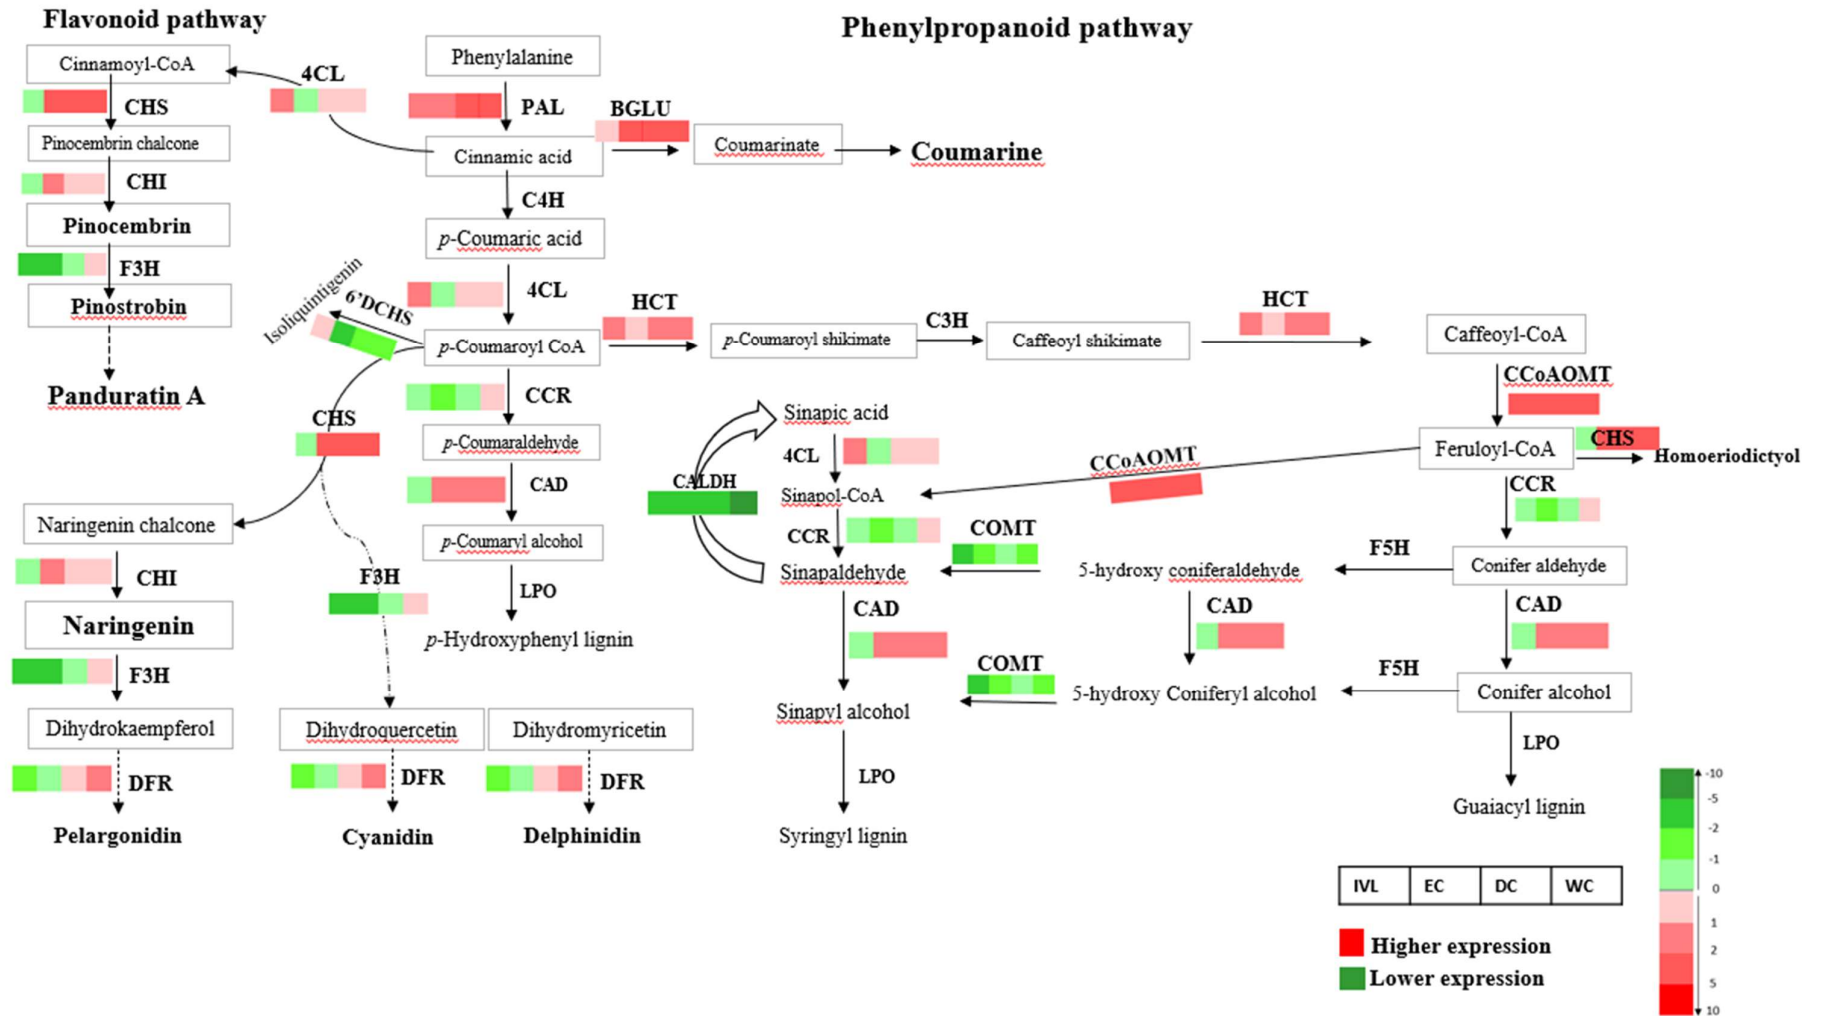

Figure 6

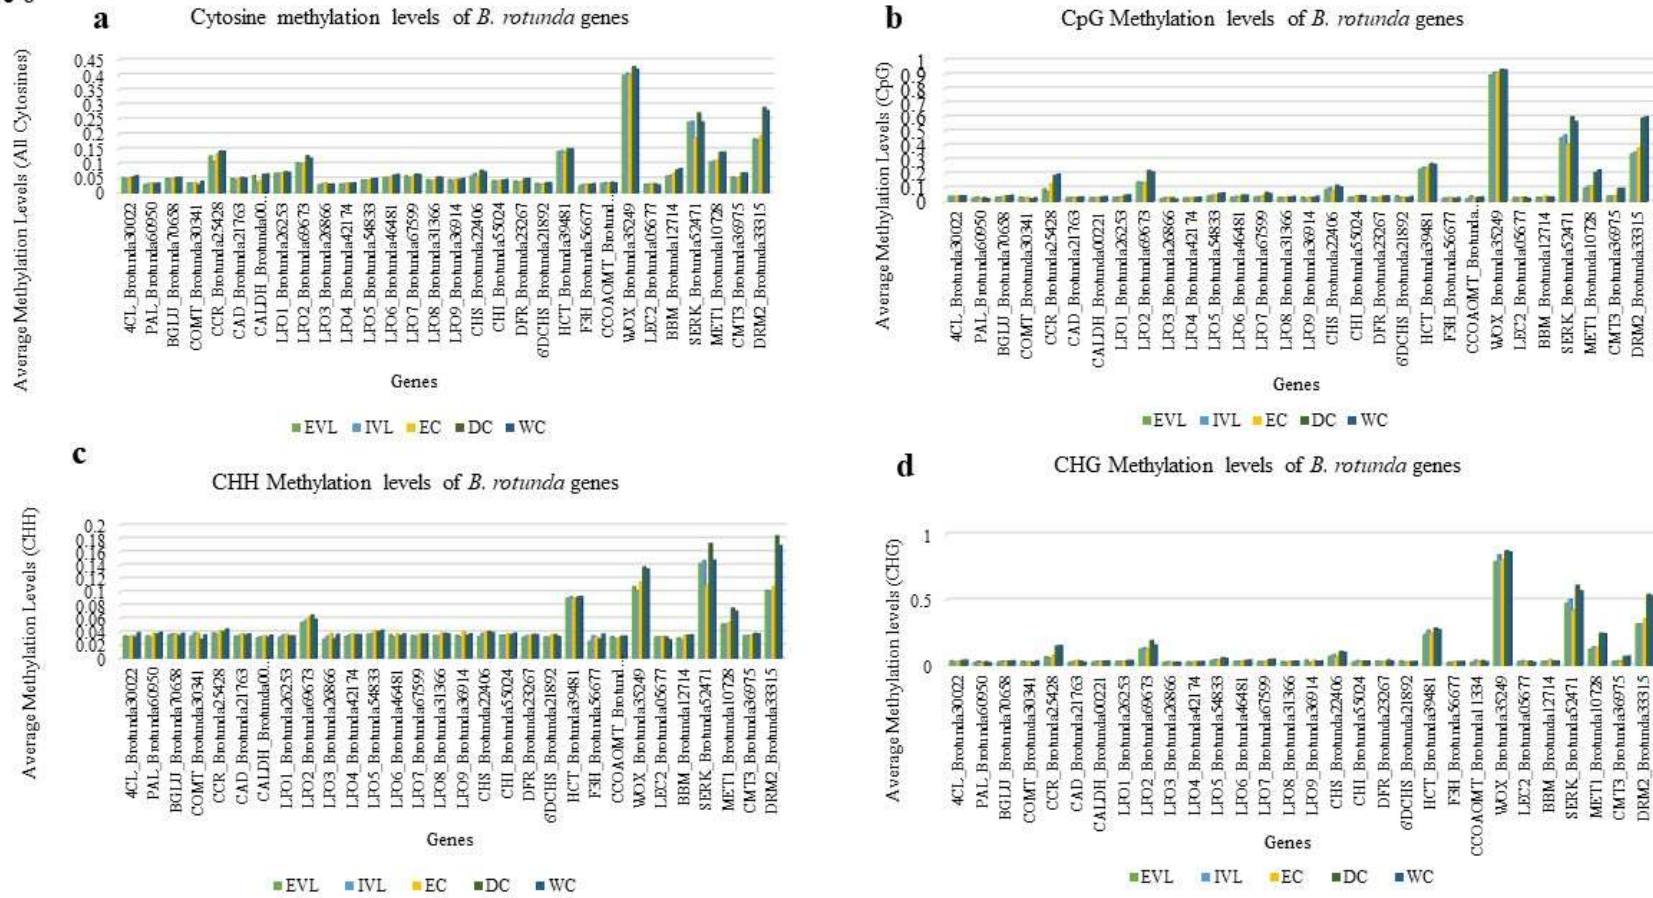

Figure 7

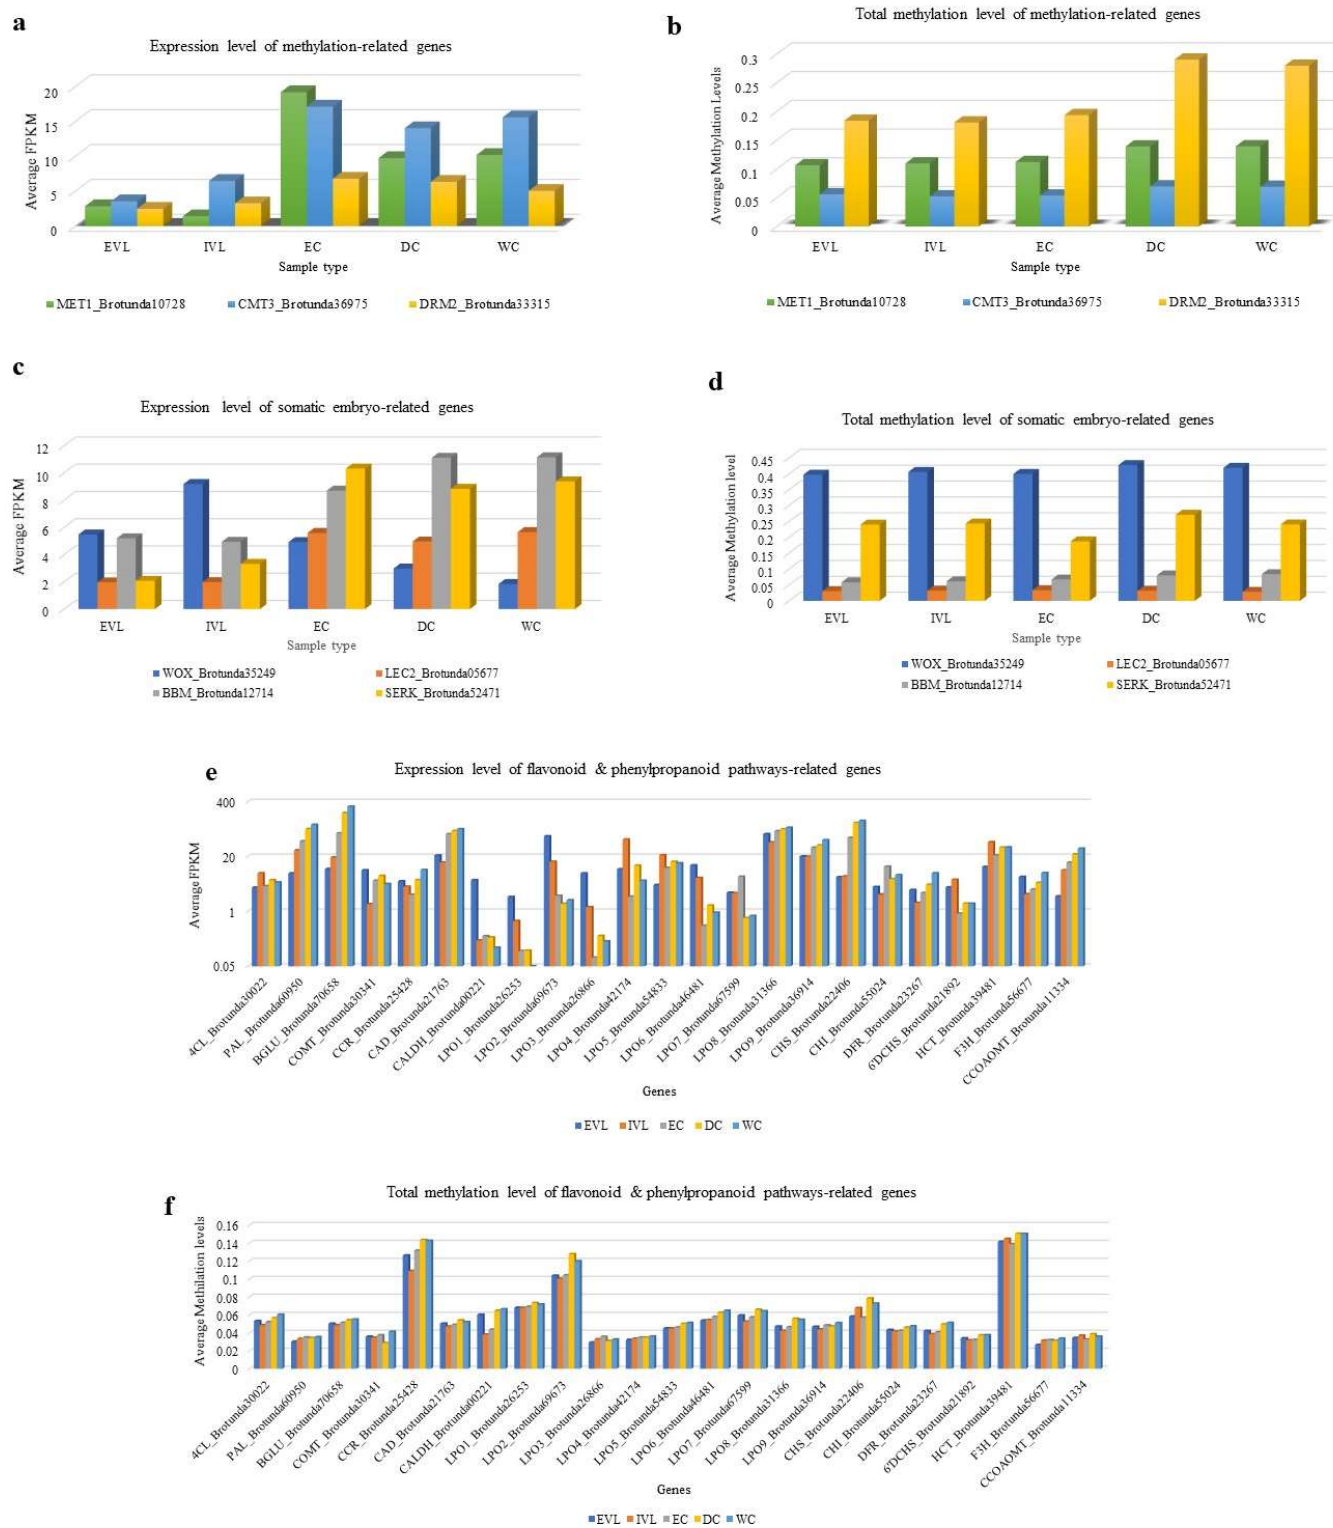

Source: https://www.biorxiv.org/content/10.1101/2022.05.11.491478v1.full.pdf
